1 Experimental evolution supports signatures of sexual selection in genomic  
2 divergence.

3

4 R. Axel W. Wiberg\*, Paris Veltsos, Rhonda R. Snook & Michael G. Ritchie\*

5

6 **RAWW**: Centre for Biological Diversity, University of St Andrews, St Andrews, Fife,  
7 Scotland KY16 9TH, UK. **Current address**: Zoological Institute, Department of  
8 Environmental Sciences, University of Basel, Basel, 4051, Switzerland. Orcid 0000-0002-  
9 8074-8670.

10 **PV**: Department of Ecology and Evolutionary Biology, University of Kansas, Lawrence, KS,  
11 USA. Orcid 0000-0002-8872-6281

12 **RRS**: Department of Zoology, Stockholm University, Stockholm 106 91 Sweden. Orcid  
13 0000-0003-1852-1448

14 **MGR**: Centre for Biological Diversity, University of St Andrews, St Andrews, Fife, Scotland  
15 KY16 9TH, UK. Orcid 0000-0001-7913-8675.

16

17 \* Corresponding authors

18

19 Article type: Letter

20

21 Running title: Sexual selection and genomic divergence

22

23 Key Words:

24 Experimental Evolution, Sexual Selection, Genomic divergence, *Drosophila pseudoobscura*,

25  $F_{ST}$ , Tajima's D, Genomic Islands, Large X effect

26

27 Total word count (main text only): 6,600

28

29 **Abstract**

30 Comparative genomics has contributed to the growing evidence that sexual selection is  
31 an important component of evolutionary divergence and speciation. Divergence by sexual se-  
32 lection is implicated in faster rates of divergence of the X chromosome and of genes thought  
33 to underlie sexually selected traits, including genes that are sex-biased in expression. How-  
34 ever, accurately inferring the relative importance of complex and interacting forms of natural  
35 selection, demography and neutral processes which occurred in the evolutionary past is chal-  
36 lenging. Experimental evolution provides an opportunity to apply controlled treatments for  
37 multiple generations and examine the consequent genomic divergence. Here we altered  
38 sexual selection intensity, elevating sexual selection in polyandrous lines and eliminating it in  
39 monogamous lines, and examined patterns of divergence in the genome of *Drosophila pseu-*  
40 *doobscura* after more than 160 generations of experimental evolution. Divergence is not uni-  
41 form across the genome but concentrated in “islands”, many of which contain candidate  
42 genes implicated in mating behaviours and other sexually selected phenotypes. These are  
43 more often seen on the X chromosome, which shows divergence greater than neutral expecta-  
44 tions. There are characteristic signatures of selection seen in these regions, with lower di-  
45 versity and greater  $F_{ST}$  on the X chromosome than the autosomes, and differences in diversity  
46 on the autosomes between selection regimes. Reduced Tajima’s D implies that selective  
47 sweeps have occurred within some of the divergent regions, despite considerable recombina-  
48 tion. These changes are associated with both differential gene expression between the lines  
49 and sex-biased gene expression within the lines. Our results are very similar to those thought  
50 to implicate sexual selection in divergence in natural populations, and hence provide experi-  
51 mental support for the likely role of sexual selection in driving such types of genetic diver-  
52 gence, but also illustrate how variable outcomes can be for different genomic regions.

53

## 54 **Impact Summary**

55 How does sexual selection contribute to the divergence of genomes? It is often thought that  
56 sexual selection is a potent force in evolutionary divergence, but finding ‘signatures’ of  
57 sexual selection in the genome is not straight-forward, and has been quite controversial re-  
58 cently. Here we used experimental evolution to allow replicate populations of fruit fly to  
59 evolve under relaxed or strengthened sexual selection for over 160 generations, then se-  
60 quenced their genomes to see how they had diverged. The features we find are very similar to  
61 those reported in populations of natural species thought to be under strong sexual selection.  
62 We found that genomic divergence was concentrated in small patches of the genome rather  
63 than widespread. These are more often seen on the X chromosome, which overall shows es-  
64 pecially elevated divergence. There are also characteristic signatures of selection seen in  
65 these regions, with lower genetic diversity suggesting that selection was strong in these re-  
66 gions. The changes are associated with both differential gene expression between the lines  
67 and sex-biased gene expression within the lines. Many of the patches of divergence also con-  
68 tain candidate genes implicated in mating behaviours and other sexually selected phenotypes.  
69 Our results provide experimental support for the likely role of sexual selection in driving such  
70 types of genetic divergence.

71

## 72 **Introduction**

73       The role of sexual selection in influencing evolutionary divergence and speciation is  
74 unclear (Panhuis *et al.*, 2001; Ritchie, 2007; Maan & Seehausen, 2011; Servedio & Bough-  
75 man, 2017). Associations between species diversity and proxies of sexual selection such as  
76 sexual dimorphism or mating system variation often imply that sexual selection can acceler-  
77 ate divergence, especially when acting alongside natural selection (Arnqvist *et al.*, 2000;  
78 Gage *et al.*, 2002; Ellis & Oakley, 2016). However, different indicators of sexual selection  
79 give contrasting results in such comparative studies, and a consensus is not clear (Kraaijeveld  
80 *et al.*, 2011; Janicke *et al.*, 2018). One potentially compelling source of evidence that sexual  
81 selection is involved in divergence is coming from the increasing number of comparative ge-  
82 nomic studies available across a range of organisms. Many descriptions of genomes, includ-  
83 ing those of species thought to have undergone strong sexual selection such as the Hawaiian  
84 *Drosophila* or African cichlids, have found that genes associated with mating behaviour or  
85 sensory perception potentially involved in sexual communication are often outliers in meas-  
86 ures of divergence (e.g. Mattersdorfer *et al.*, 2012; Kang *et al.*, 2016). It has also been known  
87 for some time that genes which diverge particularly rapidly and show stronger signatures of  
88 positive divergent selection are often sex-biased in expression (Pröschel *et al.*, 2006; Ellegren  
89 & Parsch, 2007; Zhang *et al.*, 2007). Sex-biased gene expression itself, especially male-  
90 biased expression, evolves rapidly and this is associated with indicators of sexual selection  
91 such as increased sexual dimorphism in birds (Harrison *et al.*, 2015; Wright *et al.*, 2019).  
92 However, genes with sex-biased gene expression might experience more drift than unbiased  
93 genes, either due to reduced pleiotropy (Gershoni & Pietrokovski, 2014; Allen *et al.*, 2018) or  
94 because they experience only half the selection pressure of genes with unbiased expression  
95 (Dapper & Wade, 2020). Additionally, divergence of sex chromosomes between species is  
96 usually much greater than autosomes, sometimes dramatically so (Counterman *et al.*, 2004;  
97 Ellegren *et al.*, 2012).

98       However, such patterns of divergence are not necessarily driven by elevated sexual se-  
99 lection on these genes or genomic regions. Sex-biased gene expression is thought to evolve  
100 due to sexually antagonistic selection on gene expression, which is an important factor in  
101 sexual selection but can arise due to other types of conflict. Changes in sex-bias in gene ex-  
102 pression are also complicated by additional factors including dosage compensation, turnover  
103 of sex-biased expression and resolution of conflict via sex-linkage or sex-limited expression  
104 (Mank *et al.*, 2010a; Wright *et al.*, 2019). The increased divergence of sex chromosomes is

105 also potentially influenced by many factors, including a greater role of genetic drift due to a  
106 smaller effective population size on X chromosomes compared to autosomes, dominance ef-  
107 fects, and other consequences of sex-linkage such as dosage compensation (Vicoso & Char-  
108 lesworth, 2006; Ellegren, 2009; Mank *et al.*, 2010b). Hemizyosity results in a lower effect-  
109 ive population size ( $N_e$ ) on the X ( $N_{eX}$ ) than on autosomes ( $N_{eA}$ ). Under random mating the  
110 ratio of  $N_e$  is expected to be 3:4 and this should reduce neutral diversity and increase  
111 between-species divergence by the same proportion (Vicoso & Charlesworth, 2006). Hemizy-  
112 gosity should also result in an increased efficacy of selection for partially recessive beneficial  
113 mutations on the X-chromosome, relative to autosomes, and against recessive deleterious  
114 mutations on the X, relative to autosomes. Finally, because of the female-biased inheritance  
115 patterns of X-linked loci (males transmit them only to daughters while females transmit them  
116 to both daughters and sons), sex-limited selection as well as sexual selection will influence  
117 their divergence (Mank *et al.*, 2010a; Corl & Ellegren, 2012; Wright *et al.*, 2015).

118 It is very difficult to infer the historical role of different evolutionary processes from  
119 patterns of contemporary divergence between populations and species, because they can res-  
120 ult in similar genomic signals (Butlin *et al.*, 2012). One way of directly addressing the role of  
121 sexual selection or mating system variation in genomic divergence is to examine the genomic  
122 consequences of experimental evolution under manipulated sexual selection regimes in the  
123 laboratory. A great advantage of this approach is that there are potentially fewer confounding  
124 variables involved than when making comparisons across species or natural populations.  
125 However, a disadvantage is that the time scale over which divergence can be studied is typic-  
126 ally much shorter than evolutionary time-scales in nature. Studies of experimental evolution  
127 and speciation are in their infancy, and general conclusions are, as yet, difficult to draw  
128 (White *et al.*, 2020). Enforcing monogamy in otherwise polyandrous species will lead to both  
129 changes in the intensity of sexual selection and the balance of sexual conflict, as it effectively  
130 eliminates sexual selection and sexually antagonistic selection. A classic example of such ma-  
131 nipulation is where *D. melanogaster* were kept under enforced monogamy for about 50 gen-  
132 erations (Holland & Rice, 1999). Females from the monogamy treatment had reduced longev-  
133 ity compared to ancestral females, when exposed to ancestral males. This was expected be-  
134 cause the reduction of conflict should favour less harmful males and females that are less res-  
135 istant to male harm. Other experimental evolution studies under altered mating systems have  
136 been performed in dung flies (Hosken *et al.*, 2001; Hosken & Ward, 2001; Martin & Hosken,  
137 2003), different species of fruit flies (*D. melanogaster*; (Gerrard *et al.*, 2013; Hollis *et al.*,  
138 2014; Innocenti *et al.*, 2014; Perry *et al.*, 2016); *D. pseudoobscura*; (Crudgington *et al.*,

139 2005); *D. serrata*; (Chenoweth *et al.*, 2015) , seed beetles (McNamara *et al.*, 2020) and herm-  
140 aphroditic flatworms (Janicke *et al.*, 2016). Though aspects of the treatments differ amongst  
141 such experiments, some common patterns have emerged. Gene expression changes are seen,  
142 especially of genes that are initially sex-biased, though the details can vary between studies  
143 (Hollis *et al.*, 2014; Veltsos *et al.*, 2017). Moreover, gene expression changes can be more  
144 pronounced for genes expressed in reproductive tissues (Innocenti *et al.*, 2014), and genes in-  
145 volved in the post-mating physiological manipulation of female egg-laying and re-mating  
146 rates (Perry *et al.*, 2016).

147 A feature emerging from genomic comparisons between diverging species is that details  
148 of genomic architecture complicate the assessment of patterns of divergence across chromo-  
149 somes. Whole chromosomal regions can show correlated responses due to reduced recombina-  
150 tion and hitchhiking effects, especially in species with segregating inversions. Early studies  
151 of species differences interpreted “islands” of divergence in the genome as resulting from di-  
152 vergent selection on genes within these regions with gene flow homogenising the genetic  
153 background (Turner *et al.*, 2005; Nosil *et al.*, 2009). More recently it has been appreciated  
154 that chromosomal inversions and other regions of low recombination or diversity can accen-  
155 tuate such clustered divergence (Noor & Bennett, 2009; Cruickshank & Hahn, 2014; Wolf &  
156 Ellegren, 2016; Ravinet *et al.*, 2017). “Barrier loci”, genomic regions under divergent selec-  
157 tion that restrict gene flow (Butlin & Smadja, 2018), may occur within such clusters but the  
158 lack of recombination makes them difficult to localise precisely. In experimental evolution  
159 the amount of recombination will be determined by both genomic architecture and the num-  
160 ber of generations completed during the study, which is often modest in studies of eukaryotes.  
161 Also, in experimental evolution the lines can be kept effectively allopatric, so homogenising  
162 gene flow in regions not experiencing selection should be absent. The genomic divergence  
163 which occurs during experimental evolution is usually extensive, with widespread differences  
164 dispersed throughout the genome (Kawecki *et al.*, 2012; Tobler *et al.*, 2014; Michalak *et al.*,  
165 2019).

166 Here we directly test the influence of sexual selection on genomic divergence. We ex-  
167 amine replicated experimentally evolved lines of *D. pseudoobscura* in which sexual selection  
168 has been manipulated for over 160 generations. One set of 4 replicate lines were raised under  
169 enforced monogamy (M lines), which should eliminate both sexual selection and conflict.  
170 Another 4 replicates were reared under elevated polyandry (E lines), with 6 males per female.  
171 Polyandry mediates the strength of both intra- and intersexual selection and sexual conflict  
172 (Pizzari & Wedell, 2013) and elevated polyandry will increase both pre- and post- copulatory

173 sexual selection via female choice and sperm competition beyond levels experienced in most  
174 natural populations (Snook, 2014). Previous studies of these lines have found divergence in  
175 some, but not all, of the types of traits predicted to diverge under sexual selection. Sperm  
176 morphology and heteromorphism, and testis mass did not diverge, but E males had larger ac-  
177 cessory glands and a greater mating capacity (Crudgington *et al.*, 2009), were more competit-  
178 ive in mating encounters (Debelle *et al.*, 2016), and produced more attractive courtship song  
179 than M males (Debelle *et al.*, 2017). Coevolutionary changes have occurred in female song  
180 preferences (Debelle *et al.*, 2014). Sexually dimorphic cuticular hydrocarbons have also di-  
181 verged between the lines (Hunt *et al.*, 2012).

182 Patterns of gene expression have also changed between the lines. E females show an in-  
183 crease in expression of genes normally enriched in ovaries (Immonen *et al.*, 2014). Sex-  
184 biased genes responded more strongly to the sexual selection treatment, but the direction of  
185 gene expression changes differed between sexes, tissues, and according to courtship experi-  
186 ence (Veltsos *et al.*, 2017). In most cases, the transcriptome was “feminised” under polyandry  
187 (i.e. female-biased genes were up-regulated or male-biased genes down-regulated in E lines),  
188 in a striking contrast to a similar study with *D. melanogaster* (Hollis *et al.*, 2014). Males  
189 changed in patterns of gene expression in the testes and accessory glands, and changes in  
190 gene expression in females following mating also diverged, especially in the female repro-  
191 ductive tract (Veltsos *et al. in prep.*).

192 Here we examine genomic divergence between these lines using a pool-sequence ap-  
193 proach (Schlötterer *et al.*, 2014) after more than 160 generations of experimental evolution.  
194 The relatively long time-scale of this study should reduce linkage effects on allele frequency  
195 changes. We adopt a statistical approach that identifies alleles that have changed in frequency  
196 consistently across the replicates, to help reduce the potentially confounding effects of drift or  
197 replicate-specific selection (Wiberg *et al.* 2017). We find that divergent SNPs are not distrib-  
198 uted randomly across the genome, but occur in distinct, obvious clusters. We examine what  
199 genes are involved and find several with mutant phenotypes related to mating and courtship  
200 behaviours. We found that the X chromosome has accumulated more divergence than the  
201 autosomes and explore if divergence is associated with recombination rate or changes in gene  
202 expression between the experimental lines.

203

## 204 **Methods**

### 205 *Experimental Evolution*

206 A full description of the experimental evolution procedure is available elsewhere  
207 (Crudgington *et al.*, 2005). Briefly, a population of *D. pseudoobscura* was established from  
208 50 wild caught females, bred in the laboratory for four years then four independent  
209 monogamy (M) and elevated polyandry (E) lines were established. M females were housed  
210 with a single male and E females with 6 males, with females typically mating with two or  
211 three males. The effective population size was maintained around 120 (Snook *et al.*, 2009) for  
212 both treatments to try to minimise confounding effects of drift and treatment. At each  
213 generation, offspring were collected and pooled together for each replicate line, and a random  
214 sample used to constitute the next generation in the appropriate sex ratio, thus reflecting the  
215 differential offspring production across families (Crudgington *et al.*, 2005; Crudgington *et al.*,  
216 2009). Enforced monogamy is expected to eliminate sexual selection and sexual conflict  
217 while elevated polyandry increases both pre- and postmating sexual selection and sexual  
218 conflict beyond levels encountered in most natural populations and in the ancestral  
219 population (Crudgington *et al.*, 2005; Bacigalupe *et al.*, 2007; Crudgington *et al.*, 2009).

220

### 221 *Sequencing and Mapping*

222 Sequencing was carried out after ca. 160 generations of selection (specifically, 164 for  
223 replicate 1, 163 for replicate 2, 162 for replicate 3, and generation 160 for replicate 4). Two  
224 pools of 40 females (one E and one M) were taken from each replicate line and genomic  
225 DNA extracted using a standard Phenol-Chloroform extraction protocol. Each pool was  
226 sequenced across two lanes on a Illumina HiSeq platform at the Center for Genomic Research  
227 (CGR) at the University of Liverpool. Details of coverage are provided in the Supplementary  
228 Material. Reads from each sequenced pool were mapped to the *D. pseudoobscura* reference  
229 genome (FlyBase v3.1 February 2013) using BWA mem (v. 0.7.7; Li, 2013). Alignments  
230 were filtered to remove duplicate reads, reads with a mapping quality < 30, and any reads  
231 which were not properly paired, using samtools (v 1.3; Li *et al.*, 2009 following Schlotterer *et*  
232 *al.*, 2014). Reads were locally re-aligned around indels using GATK (v3.7.0; McKenna *et al.*,  
233 2010; DePristo *et al.*, 2011). The .bam files for each line were then merged using bamtools  
234 (Barnett *et al.*, 2011) and the genome-wide coverage calculated from these merged files with  
235 bedtools (v. 2.26; Quinlan & Hall, 2010). SNPs were called using a heuristic SNP calling  
236 algorithm (PoolSNP; Kapun *et al.*, 2020). Sites were considered only if the total coverage at  
237 the site was > 17 and < the 95<sup>th</sup> percentile for each contig or chromosome. An allele was only  
238 called if the count for that allele across all pools was > 16 and the allele frequency across all



239 pools was  $> 0.001$ . Nearly 2 million SNPs were called and used in downstream analyses (see  
240 Supplementary Material).

241

## 242 *Genomic Analyses*

### 243 *Identifying Consistent Allele Frequency Differences*

244 Many evolve and resequence studies of *Drosophila* find that a multitude of SNPs have  
245 diverged, perhaps tens of thousands (Michalak *et al.*, 2019). The number is inflated upwards  
246 at least in part due to segregating inversions and other areas of low recombination, and  
247 hitchhiking (Barghi & Schlotterer, 2019). In order to focus on the loci most likely to have  
248 diverged due to the treatment, we only considered as candidate SNPs those which diverged  
249 consistently across all 4 replicate pairs of lines. We identified these using quasibinomial  
250 Generalised Linear Models, which are less prone than other statistical approaches to be  
251 influenced by strong divergence in only some replicates (Wiberg *et al.*, 2017). The model  
252 structure applied was;

$$253 y \sim \text{treatment} + e$$

254 where  $y$  is the allele frequency of the major allele (identified as the major allele across  
255 all pools) within each sample, *treatment* is the experimental evolution treatment regime of  
256 each sample, and  $e$  is a quasibinomially distributed error term. If any count within a  
257 population was 0, +1 was added to all counts. P-values were converted to q-values using the  
258 “qvalues” R package (v. 2.16.0; Storey & Tibshirani, 2003). A threshold of 0.05 was chosen  
259 to control the false discovery rate (FDR), thus we define “top SNPs” as those which change  
260 consistently across all replicates with q-value  $< 0.05$  and the remainder are referred to as  
261 “background” SNPs.

262

### 263 *Genetic Diversity and Differentiation*

264 We calculated genome-wide genetic diversity statistics ( $\pi$  and Tajima’s D) for windows  
265 of 50kb (with a 10kb overlap) using available python scripts (Kapun *et al.*, 2020). Similarly,  
266 we computed pairwise  $F_{ST}$  estimates between E and M line pairs for each SNP using the R  
267 package “poolstat” (v. 0.0.1; Hivert *et al.*, 2018), averaged in windows of 50kb (with a 10kb  
268 overlap between windows). Comparisons of parameters between selection regimes and  
269 genomic regions were tested using non-parametric Wilcoxon tests. Additionally, we estimated  
270 neutral expectations for  $F_{ST}$  expected from drift and differences in effective population sizes  
271 on X chromosomes ( $F_X$ ) as in (Machado *et al.*, 2016) using the equations of (Ramachandran  
272 *et al.*, 2004) (equation 8 therein),  $F_X$  is given by:

273

$$F_X = 1 - \left( \frac{9(z+1)(1-F_A)}{8(2z+1) - (1-F_A)(7z-1)} \right)$$

274

275

276 where,  $z$  is the ratio of the number of breeding males to females and  $F_A$  is the observed  $F_{ST}$  on  
277 autosomes. We assumed  $z$  to be either 1 or 6 to represent extreme possibilities based on the  
278 mating system manipulation. For each E-M pairwise comparison, we calculated mean  $F_{ST}$   
279 across each chromosome type and converted to  $F_X$ . We used a bootstrapping approach to  
280 obtain a random distribution of  $F_X$  for each replicate. For each of 1,000 bootstrap iterations  
281 we sampled, with replacement, a number of windows equal to the total number across all  
282 autosomes from the set of all windows, then we calculated mean  $F_{ST}$  across all sampled  
283 windows and converted to  $F_X$  using the equation above. Additionally, we computed a value of  
284  $F_{ST}$  and Tajima's  $D$  for each annotated *D. pseudoobscura* gene by taking the mean value  
285 across all 50kb windows that spanned a gene.

286

### 287 *Linkage Disequilibrium (LDx)*

288 Although haplotype information is not available from pool-seq data, short range linkage  
289 information is available from paired reads. We used LDx (Feder *et al.*, 2012) to first compute  
290 the  $r^2$  of SNPs located on the same read pairs. We only used SNPs with a minor allele  
291 frequency  $> 0.1$ , a minimum coverage of 10, a maximum read coverage of 400, and a phred  
292 score  $> 20$ . Note that the empirical median insert size varied between 332-346 across  
293 samples. We binned pairs of SNPs into distance classes and then computed mean  $r^2$  per  
294 distance class. We only used distance classes with a minimum of 5 SNPs. We estimated the  
295 decay of  $r^2$  as a function of distance by fitting a linear model of  $r^2$  as a function of the log of  
296 the distance between the SNPs. Thus, the slope measures the decay rate of linkage due to  
297 recombination (Feder *et al.*, 2012), giving an indication of the distance over which LD is  
298 present. In regions of low recombination one would expect high overall values of  $r^2$  but a  
299 weakly negative slope as LD is maintained over relatively longer regions of the genome.  
300 Comparing the slope parameter across different genomic regions gives an indication of  
301 differences in the recombination rate (or extent of selective sweeps). This was performed for  
302 each chromosome, as well as for different regions on the 3<sup>rd</sup> chromosome (see below).

303

### 304 *Functional Genomics*

305 To examine the function of genes near candidate SNPs we conducted enrichment  
306 analyses. We used the *D. pseudoobscura* annotation and a dataset of regulatory long non-  
307 coding RNAs (lncRNAs; Nyberg & Machado, 2016). We identified genes or lncRNAs within  
308 a distance of 10kb up- or downstream of top SNPs with bedtools (Quinlan & Hall, 2010)  
309 intersect (keeping any potential ties). Enhancer regions, transcription factor binding sites, and  
310 other regulatory regions can occur up to 1 Mb up- or downstream from a target gene in other  
311 species (e.g. Maston *et al.*, 2006; Chan *et al.*, 2010; Werner *et al.*, 2010; Pennacchio *et al.*,  
312 2013) but typically lie within 2kb of a gene region in *D. melanogaster* (Arnosti, 2003), 10kb  
313 thus represents a compromise. We submitted the implicated genes to ModPhEA (Weng &  
314 Liao, 2017) for phenotypic enrichment analysis. We combined the phenotypic classes  
315 “courtship behavior defective” (FBcv:0000399) and “mating rhythm defective”  
316 (FBcv:0000401) into one phenotype group and also tested the phenotypic class “stress  
317 response defective” (FBcv:0000408) for enrichment. We chose these classes *a priori* because  
318 they were most likely to be involved in phenotypic differences between the treatments related  
319 to mating or courtship behaviour and responses.

320 We also took advantage of gene expression data from the same experimental evolution  
321 lines. Expression data is available from heads and abdomens of virgin and courted flies  
322 (Veltsos *et al.*, 2017) and testes, accessory glands, ovaries and female reproductive tracts  
323 from virgin flies, and ovaries and female reproductive tracts from mated females (Veltsos *et*  
324 *al.*, *in prep.*). Using these data we compiled a list of genes with differential expression  
325 between E and M lines. For simplicity we considered a gene to be differentially expressed  
326 between E and M lines if it shows significant differences in E/M contrasts in any of the  
327 following data: combined virgin and courted head or abdomens of each sex (4 sets), virgin  
328 individual reproductive tissues (4 sets), mated individual female reproductive tissues (2 sets).  
329 Briefly, the analysis was conducted in edgeR v3.18.1 (Robinson *et al.*, 2010) running in R  
330 v.3.4.0 ( R Development Core Team, 2007). We used TMM normalization in edgeR and  
331 measured dispersion using a negative binomial model from the genes within each contrast.  
332 We employed a statistical definition for differential expression (FDR < 0.05; (Benjamini &  
333 Hochberg, 1995) and did not require a minimum logFC threshold to consider a gene  
334 differentially expressed as the effect of allometry should be minimal for samples from  
335 specific organs (Montgomery & Mank, 2016), and the results are cross-checked with top  
336 SNPs, making the analysis conservative. The associated scripts and final #number# gene set  
337 are available in OSF1, OSF2, File S#.

338 We used this list to ask if top SNPs co-localised with genes that are differentially  
339 expressed between the lines and if these also show different levels of diversity (Tajima's D)  
340 or differentiation ( $F_{ST}$ ) between E and M lines. We used a resampling approach, sampling  
341 genes (without replacement) from the *D. pseudoobscura* annotation, to determine the amount  
342 of overlap with the DE genes that is expected by chance. For each sample, we picked a set of  
343 428 genes from the annotation, which is the same size as the set of genes near top SNPs (see  
344 Results). We then calculated the proportion of these genes that also occur in the DE gene sets  
345 and repeated this procedure 1,000 times to build a distribution of expected overlap between  
346 re-sampled gene-sets and the DE gene sets. If the empirical set of genes near top SNPs had a  
347 proportional overlap  $\geq$  the 95<sup>th</sup> percentile of the re-sampled distribution it was deemed a  
348 "significant" overlap.

349 Using the values of Tajima's D and  $F_{ST}$  computed for each gene (see above) we also  
350 asked whether there was any evidence of different levels of diversity or divergence between  
351 DE genes in any set (N = 3,173) and non-DE genes (N = 13,583). For Tajima's D we contrast  
352 DE and non-DE genes separately for each chromosome type (autosomes, X-chromosome left  
353 arm, X-chromosome right arm), and each experimental evolution treatment (E and M; 6  
354 contrasts in total), using Wilcoxon rank sum tests. For  $F_{ST}$  we contrast DE genes and non-DE  
355 genes separately for each chromosome type (3 contrasts), testing for differences with  
356 Wilcoxon rank sum tests. In both cases, the mean value for non-DE genes was used as a  
357 single value against which to compare DE genes, which reduces the effect of the enormous  
358 sample size for the non-DE genes on the significance of the test.

359 Finally, we also asked whether the changes in sex-biased expression (data from Veltsos  
360 *et al.*, 2017) between E and M treatments ( $\Delta SB_{EM}$ ) was related to diversity (Tajima's D)  
361 within either E or M lines. Sex-bias in expression was assessed for two tissues, head and  
362 abdomen, in both courted or virgin data combined. Within each tissue, sex-bias was  
363 computed as the  $\log_2$ (fold change) in expression between males and females in E and M lines  
364 separately, after which  $\Delta SB_{EM}$  is calculated as  $\log_2(FC)_E - \log_2(FC)_M$ . Thus, positive values of  
365  $\Delta SB_{EM}$  correspond to greater male-bias in expression in the E lines, while negative values  
366 correspond to greater male-bias in the M lines.  $\Delta SB_{EM}$  was then related to values of Tajima's  
367 D in either E ( $TajD_E$ ) or M ( $TajD_M$ ) lines. For each tissue (head and abdomen) we performed  
368 an ANCOVA with chromosome (autosome, X-chromosome right arm, and X-chromosome  
369 left arm) as a co-factor, as well as mean Tajima's D across E lines and mean Tajima's D  
370 across M lines as co-variates. We also included the interactions between Tajima's D and  
371 chromosome. The full model is:

372

373  $\Delta SB_{EM} \sim chromosome + TajD_E + TajD_M + TajD_E:chromosome + TajD_M:chromosome$

374

375 We further extracted the 30bp up- and down-stream of each SNP from the reference  
376 genome using gffread from the Cufflinks package (v2.2.1; (Trapnell *et al.*, 2010) and tested  
377 for an enrichment of TF binding site motifs around top SNPs with the AME routine from the  
378 MEME package (v. 4.10.2; (McLeay & Bailey, 2010). GO term enrichment analysis was  
379 performed with GOwinda (v. 1.12; (Kofler & Schlotterer, 2012). We considered SNPs to be  
380 associated with genes if they occurred within 10kb up or downstream of an annotated gene.  
381 An empirical p-value distribution was produced from 1 million simulated SNP sets.

382 All statistical analyses were made with R (v. 3.6.3; R Development Core Team 2020)  
383 except where otherwise stated. Figures were drawn using the “ggplot2” package (v. 2.2.1;  
384 (Wickham, 2009) and associated packages (table S1).

385

## 386 **Results**

### 387 *Consistent Allele Frequency Differences*

388 In total, 480 SNPs show significant consistent allele frequency differences due to the  
389 experimental evolution treatment (hereafter the “top SNPs”). These occur on all of the main  
390 chromosomes but many show striking co-occurrence into a few clusters of highly  
391 differentiated SNPs (figure 1A). The distribution of the top SNPs across the genome is not  
392 random, with a significant excess on the 3<sup>rd</sup> chromosome and both arms of the X chromosome  
393 (table S3). In particular, a large cluster of differentiated SNPs are observed at the end of the  
394 right arm of chromosome 3 (figure 1A). Other large clusters occur on both arms of the X  
395 chromosome (figure 1A). If all top SNPs within 50kb of others are grouped into clusters, this  
396 produces 70 distinct clusters throughout the genome (figure 1A). The majority of SNPs  
397 (72.9%) occur in only 6 clusters with > 10 SNPs.

398 Such clustered divergence is often seen in comparisons between natural species  
399 (Ravinet *et al.*, 2017) but rarely in experimental evolution (e.g. Kauranen *et al.*, 2019). We  
400 considered 10 random permutations of the treatment labels among SNP sets and observed far  
401 fewer SNPs with q-values < 0.05 than in the original dataset. We are therefore confident that  
402 our approach reliably identifies SNPs with consistently different allele frequencies between  
403 the treatments. We also tested if the divergence was more clustered than random samples  
404 between the lines using a permutation test (for full details of the randomisation tests see the  
405 Supplementary Material). We also examined if variation in coverage might be associated with

406 calling clustered divergence. We compared coverage within these clusters to 100 random  
407 genomic regions with a similar distribution in size shows that, although there is a minor  
408 difference in coverage between peaks with top SNPs, the variation in coverage across  
409 samples is far greater, we therefore conclude that difference in coverage around top SNPs and  
410 the rest of the genome cannot explain the patterns (figure S1).

411 The clusters do not correspond to known inversions in *D. pseudoobscura*. In particular,  
412 the large cluster on chromosome 3 containing many (N = 199, 41.5%) top SNPs does not  
413 correspond to the most common inversions that have shaped the evolution of this  
414 chromosome in the wild (Wallace et al., 2011; Wallace et al., 2013). Allele frequencies in E  
415 and M lines for the top 100 SNPs are shown in figure S2. More than half of these (57%) are  
416 fixed differences in all replicates. Across all the top SNPs, 12% are fixed differences between  
417 the E and M lines in all replicates, with all of these occurring on the X chromosomes

418

#### 419 *Genetic diversity*

420 We identified a set of candidate SNPs which varies consistently in allele frequency in  
421 response to experimental treatment. Such patterns are strongly suggestive of the action of  
422 selection. We therefore also assessed the levels of genetic diversity throughout the genome  
423 and in regions surrounding these candidates. On a broad scale, Tajima's D does not vary  
424 much across chromosomes (figure S3). Strikingly, Tajima's D is substantially lower on  
425 chromosome 3, though the interaction effect of chromosome and treatment is not statistically  
426 significant ( $F_{4,30} = 0.59$ ,  $p = 0.68$ ). Strongly localised selective sweeps, should locally reduce  
427 Tajima's D. Within E lines, Tajima's D is actually on average slightly higher within the  
428 clusters containing top SNPs (-0.03) than outside these clusters (-0.05; Wilcoxon signed rank  
429 test:  $V = 17623$ ,  $p\text{-value} = 0.04$ ). Within M lines there is no statistically significant difference  
430 between clusters (-0.07) and outside clusters (-0.06;  $V = 13390$ ,  $p\text{-value} = 0.3$ ). However,  
431 patterns of Tajima's D are very variable. The most differentiated region on chromosome 3  
432 shows reduced Tajimas's D within the E treatment compared to the M treatment (figure 1B),  
433 as would be expected following selective sweeps. Similar patterns are seen for some peaks on  
434 the X chromosome (figure S4). In a few cases, there are reductions of Tajima's D associated  
435 with regions containing top SNPs within M lines compared to E lines (figure 1B and figure  
436 S4). However, many of these regions are quite small and consequently estimates of Tajima's  
437 D may be unreliable (figure S3).

438 Nucleotide diversity across the chromosomes was estimated as  $\pi$  (figure S5). Diversity  
439 is lower overall in E lines than in M lines (figure 2A). Diversity varies significantly across

440 chromosomes in both E and M lines (figure 2A;  $F_{4,30} = 29.3$ ,  $p < 0.001$ ), but the interaction  
441 with treatment is not significant ( $F_{4,30} = 0.98$ ,  $p = 0.44$ ). Lowest diversity (in both treatments)  
442 is seen on the more differentiated chromosomes (X and 3; figure 2A). Median  $\pi$  is marginally  
443 non-significantly lower within the clusters of M ( $V = 12471$ ,  $p = 0.05$ ), but not E ( $V = 13843$ ,  
444  $p = 0.19$ ), lines. The ratio of diversity between the sex chromosome and autosomes is lower  
445 in E lines than in M lines, though this is variable across replicates (figure 2B). Overall, it  
446 seems like there is greater evidence for selective sweeps in E lines, especially for the X.

447 Comparisons of genomic divergence are often based on patterns of  $F_{ST}$ . Although  
448 obviously not independent of changes in allele frequency, we also examined the patterns of  
449  $F_{ST}$  seen between the E and M lines for comparison with published studies and to examine the  
450 X / autosome divergence in more detail.  $F_{ST}$  is generally higher on the X chromosome than on  
451 autosomes (figure 3B), even after accounting for the expected greater effects of drift on the X  
452 over the autosomes (see Methods for the equations; figure 3B). Hence the X:A ratio of  $F_{ST}$  is  
453 always  $> 1$  (figure 3C). These results hold regardless of the value of  $z$  (see Methods for the  
454 equations).  $F_{ST}$  was higher within peak regions than outside peak regions (0.64 vs. 0.59;  
455 Wilcoxon signed rank test:  $V = 15309$ ,  $p$ -value  $< 0.001$ , Figure 3D), as expected as allele  
456 frequencies differ most within the clusters. It should be noted that the above measures of  
457 differentiation and genetic diversity are often variable and precise estimates depend on the  
458 number of SNPs detected, the coverage, and number of replicate lines. Accordingly, we  
459 emphasise that while broad-scale patterns are likely to be robust, values for any one genomic  
460 region or gene should be taken with appropriate caution.

461

### 462 *Linkage Disequilibrium*

463 Background selection or selective sweeps could lead to clustered genomic divergence,  
464 often with low diversity, especially in regions of low recombination such as telomeric  
465 regions. We examined patterns of linkage disequilibrium in the clusters and if this varied with  
466 treatment. Throughout the genome, the decay rate ( $a$  parameter) of LD is generally shallower  
467 (i.e. less negative) in the E treatment (figure 4A). This is seen for chromosome 3 as well as  
468 both arms of the X chromosome (figure 4A). A lower decay rate is indicative of more LD,  
469 due to less recombination and/or a potential for greater hitchhiking under positive selection.  
470 Contrary to predictions, we found a steeper rate of decay (less LD) within the differentiated  
471 region of chromosome 3 than outside it, especially in E lines (figure 4B and C). Although  
472 statistically significant ( $F_{(2,13)} = 4.6$ ,  $p < 0.001$ ), these differences are slight. The most striking  
473 pattern overall is greater overall LD on chromosome 3.

474

#### 475 *Gene functions and expression variation*

476 Out of the 480 top SNPs, 201 (42%) lie within a gene model (i.e. either in an intron or  
477 within an exon; the remaining are intergenic. The top SNPs are not significantly enriched in  
478 any GO terms after correcting for multiple testing, even at a 10% FDR (table S4). Similarly,  
479 there is no enrichment of genes with annotations for mating behaviour or stress response  
480 phenotypic classes. However, several genes within 10kb of a top SNP are potentially  
481 interesting candidate genes for traits evolving under sexual selection based on described  
482 functions (table S4). For example, the genes *Odorant-binding protein 47a (Obp47)*,  
483 *pickpocket 6 (ppk6)*, and *Accessory gland protein 53C14c (Acp53C14c)* all occur within 10kb  
484 of a top SNP and are genes potentially underlying sexually selected behaviours or traits. Two  
485 of these genes (*ACP53C14c* and *Obp47a*) are within the region of highly differentiated SNPs  
486 on the 3<sup>rd</sup> chromosomes, which also includes several additional accessory gland proteins  
487 (*Acp53Ea*, *Acp53C14b*, *Acp53C14a*), and other genes (table S4), all of which are thought to  
488 influence mating and courtship behaviours or phenotypes based on known functions of  
489 similar genes in *D. melanogaster*.

490 Previous studies have shown that there is divergence in gene expression patterns  
491 between E and M lines (Immonen *et al.*, 2014; Veltsos *et al.*, 2017; Veltsos *et al.*, *in prep.*).  
492 We therefore asked if these expression differences were associated with the top SNPs. Genes  
493 within 10kb (N = 428) of the top SNPs show a significantly greater overlap with genes that  
494 are differentially expressed (DE) in ovaries and testes between E and M lines than expected  
495 by chance (figure S6 and table S3). This pattern also holds for genes within 1Mb (N = 7,045;  
496 figure S7). Also, there is evidence that  $F_{ST}$  between E and M lines is higher for genes that are  
497 DE between the lines, especially for X-linked genes (figure 5A; Wilcoxon rank sum tests,  
498 Autosomes -  $V = 1026000$ ,  $p = 0.03$ ; X-chromosome right arm -  $V = 89067$ ,  $p = 0.005$ ; X-  
499 chromosome left arm -  $V = 59623$ ,  $p = 0.04$ ). There is no evidence that Tajima's D is  
500 different between DE and non-DE genes (Wilcoxon rank sum test; all  $p > 0.05$ ; figure 5B).  
501 There is some evidence that the degree to which sex-biased expression of a gene changes  
502 between E and M lines is associated with Tajima's D in M lines, but only on the X-  
503 chromosome and only within abdominal tissues (figure 5C). Specifically, as the change in  
504 sex-bias becomes more negative (i.e. more female-biased expression in M lines), Tajima's D  
505 also becomes more negative (interaction of Tajima's D in M lines and chromosome type:  
506  $F_{(11189,11191)} = 4.4$ ,  $p = 0.01$ ).



507 The regions immediately up- or down-stream of top SNPs are not enriched for TF  
508 binding motifs or lncRNAs, after correction for multiple testing, so there were no obvious  
509 differences between treatments in regions expected to influence gene expression variation.

510

## 511 **Discussion**

512 There is much debate about the influence of sexual selection and sexually antagonistic  
513 selection on patterns of genomic variation (Mank, 2017; Sayadi *et al.*, 2019) and how this  
514 may influence divergence between species (Wolf & Ellegren, 2016). Sex-biased gene  
515 expression, especially male-bias, evolves quickly and is related to phenotypic sexual  
516 dimorphism (Wright *et al.*, 2019). Outliers in genome scans often implicate sexual selection  
517 as a diversifying force (Andres *et al.*, 2008; Blankers *et al.*, 2018). Sexual antagonism may be  
518 associated with genomic signatures of selective sweeps or balancing selection (Cheng &  
519 Kirkpatrick, 2016; Wright *et al.*, 2019) and may be promoted by strong sexual selection  
520 (Connallon & Clark, 2012; 2013; Dutoit *et al.*, 2018; Ruzicka *et al.*, 2019). However,  
521 inferences of the sources of selection on natural variation in genomic divergence are usually  
522 indirect and ambiguous, because multiple forces act in concert to produce variation seen at  
523 the genomic level in nature. Here we used experimental evolution to alter sexual selection  
524 intensity, elevating sexual selection in polyandrous lines and eliminating it in monogamous  
525 lines, and examined patterns of divergence in the genome after more than 160 generations of  
526 experimental evolution.

527 Many of the results we found recapitulate patterns seen in natural populations and  
528 between species. Divergence is not uniform across the genome but clustered in “islands” of  
529 divergence, some of which contain candidate genes for an involvement in mating success.  
530 These clusters are more often seen on the X chromosome, which is a “hot spot” for  
531 divergence. There are signatures of selection within the islands of divergence, with  
532 marginally lower diversity ( $\pi$ ) within clusters than the rest of the genome, but only in M lines.  
533  $F_{ST}$  between E and M lines is greater within clusters, and is also greater on the X than  
534 autosomes, and differences in diversity are seen in the autosomes between selection regimes.  
535 Low Tajima’s D implies selective sweeps have occurred, but only within some of the  
536 divergent regions. These patterns of diversity and divergence are associated with changes in  
537 both differential gene expression between the lines and sex-biased genes. Overall,  $F_{ST}$   
538 between the lines is high in all replicates, probably due to low overall effective population  
539 sizes, though effective population sizes are similar between E and M lines (Snook *et al.*,  
540 2009).

541 The concept of “islands” of divergence originated from comparisons of genomic  
542 divergence between species (Nosil *et al.*, 2009; Ravinet *et al.*, 2017). These are usually  
543 thought to have arisen due to the combination of strong selection on barrier loci and genetic  
544 hitchhiking within genomic regions, with background gene flow reducing divergence outside  
545 of the islands. Here we find distinct clustered divergence akin to the islands seen in natural  
546 systems. Our system is effectively allopatric, so there was no background gene flow  
547 counteracting divergence outside of these clusters, which therefore must have arisen due to  
548 strong localised divergent selection across all replicates. Although *D. pseudoobscura* has  
549 relatively well-characterised inversion polymorphisms (Sturtevant & Dobzhansky, 1936;  
550 Dobzhansky & Sturtevant, 1938; Wallace *et al.*, 2011), the clusters we describe do not  
551 correspond to the most common inversions known for this species, which are often very  
552 large. Our short-read sequencing approach allowed some examination of LD and there was  
553 no suggestion of reduced recombination within the clusters. In fact, the large peak at the right  
554 end of chromosome 3 (figure 4) surprisingly seems to be within a region of high  
555 recombination (which is often suppressed at telomeric regions). Interestingly, recombination  
556 is higher within this peak than the chromosome-wide rate, but also differs between the  
557 treatments, being greater in the M lines. Perhaps selection against recombination was reduced  
558 in monogamous individuals because of epistatic interactions in the region which were  
559 important in sexual selection or sexual conflict. There was no obvious difference in LD in the  
560 other clusters but their smaller size and hence “noisier” estimates makes robust inferences  
561 from pool-seq data difficult. Indeed, the estimates of LD within the cluster on chromosome 3  
562 also rely on relatively few SNPs at longer ranges compared to the rest of the chromosome, so  
563 inferences need to be taken with caution.

564 The lack of background gene flow or stronger linkage disequilibrium within the clusters  
565 suggests that they have arisen primarily through localised strong selection that is consistent  
566 across all replicates. In support of this, we see lower Tajima’s D in some of the larger clusters.  
567 However, these patterns are very variable with lower Tajima’s D in different clusters for the E  
568 and M lines. Thus, overall, there is no significant difference in Tajima’s D between E and M  
569 lines. Systematic differences in  $N_e$  between E and M lines might be expected to lead to  
570 consistent differences in Tajima’s D. One might predict lower  $N_e$  in M lines due to fewer  
571 mating individuals and, correspondingly, lower Tajima’s D in M lines, though the  
572 experimental design tried to minimise this and previous studies found no evidence of such a  
573 reduction in  $N_e$  (Snook *et al.*, 2009).

574 The genes contained within the clusters are not enriched for genes of particular  
575 functional categories, however, they do include strong candidate genes for an involvement in  
576 mating system evolution. For example, the large region on chromosome 3 contains numerous  
577 accessory gland proteins. In *D. melanogaster* these are well known to influence male  
578 reproductive success, exert antagonistic effects on female fecundity and lifespan, and play a  
579 role in sperm competitive success (Chapman *et al.*, 1995; Ram & Wolfner, 2007). Some of  
580 the evolutionary response in E lines is antagonistic, because M females have a lower  
581 fecundity when mated with E males. Moreover, when mated to E males, the reproductive  
582 schedule of M females is manipulated to the males benefit (Crudgington *et al.*, 2010).  
583 Accessory gland proteins show accelerated coding sequence and expression evolution across  
584 species (Swanson & Vacquier, 2002; Begun & Lindfors, 2005). Other genes within the  
585 clusters are involved in sexual chemical communication, which is also often implicated in  
586 outlier analyses in genome comparisons between species (Smadja & Butlin, 2009). For  
587 example, mutants of members of the pickpocket family in *D. melanogaster* show aberrant  
588 male mating success because of their involvement in the detection of female pheromones  
589 (Thistle *et al.*, 2012; Toda *et al.*, 2012). E males, subject to both intra- and intersexual  
590 selection, have diverged in aspects of courtship behaviour, such as time until initiation of  
591 courtship, have a higher intensity courtship song and have a higher competitive mating  
592 success than M males (Debelle *et al.*, 2016; Debelle *et al.*, 2017).

593 If strong selection has driven this clustered genomic divergence, an interesting question  
594 is whether the responses to selection are stronger in the E or M lines. Imposing monogamy on  
595 a naturally polyandrous species probably leads to relaxed selection on many genes involved  
596 in intra- or intersexual competition. Therefore, the response is likely to involve changes in  
597 both the intensity and direction of selection on some loci. Thus, perhaps the variation in  
598 signals of selection we see in Tajima's D and changes in LD are to be expected. Overall, we  
599 see stronger reductions in diversity in E lines, perhaps suggesting that directional selection  
600 was stronger when sexual selection was strengthened.

601 One pattern very commonly seen in studies of natural populations and species is more  
602 rapid divergence of the X chromosome (Vicoso & Charlesworth, 2006). We also see this here,  
603 the X having a higher prevalence of divergent clustered regions and consequently higher  $F_{ST}$   
604 between the lines. Remarkably, all SNPs with fixed differences between the lines occurred on  
605 the X. Faster X evolution can occur for many reasons, including greater genetic drift due to  
606 its smaller effective population size, and beneficial recessive alleles on the X are more  
607 responsive to selection due to male hemizyosity (Meisel & Connallon, 2013). We calculated

608 expected X/A divergence ratios under a range of plausible sex ratios and the observed X/A  
609 divergence exceeded all of them, suggesting the accelerated X divergence is not due to drift  
610 effects alone, selection or a combination of effects are likely involved. Genes under sexual  
611 selection are potentially more likely to be sex-linked, due to antagonistic, or sex-limited  
612 selection (Reinhold, 1998; Kirkpatrick & Hall, 2004). Sexually selected or antagonistic loci  
613 are perhaps also more likely to show dominance effects (Grieshop & Arnqvist, 2018).

614 Previously we found that gene expression differences have evolved between the lines,  
615 especially in sex-biased genes (Veltsos *et al.*, 2017). Here we show that there is significant  
616 overlap between differentially expressed genes and the regions of genomic divergence of the  
617 lines found here. Thus, the expression divergence is associated with the broad patterns of  
618 genomic divergence. Also,  $F_{ST}$  is greater for the differentially expressed genes, once again  
619 recapitulating patterns from natural systems (sex-biased genes here are not more likely to be  
620 sex-linked, so this is independent of the large X effect seen). We find no overall difference in  
621 Tajima's D between DE and non-DE loci.

622 Links between genomic parameters and sex-biased gene expression variation have been  
623 a somewhat contentious source of evidence of sexual selection, especially antagonistic forms  
624 of sexual selection (Kasimatis *et al.*, 2019; Cheng & Kirkpatrick, 2020; Mank *et al.*, 2020).  
625 Genes that are male-biased in expression show accelerated divergence between species and  
626 sex-biased gene expression shows rapid evolution and turnover (Pröschel *et al.*, 2006;  
627 Harrison *et al.*, 2015). Whether sex-biased expression is expected to be related to sex-specific  
628  $F_{ST}$  or signatures of balancing selection such as Tajima's D is open to debate, partly because  
629 of the potential resolution of antagonistic selection by the strengthening of sex-biased  
630 expression. However, there is one very intriguing pattern in our data where the magnitude of  
631 change in sex-biased gene expression is related to Tajima's D. As  $\Delta SB$  increases (i.e. more  
632 male-biased expression in E lines) Tajima's D in these lines becomes more negative. This  
633 pattern is potentially consistent with more resolved sexual conflict in the M lines, because  
634 males in M lines are released from sexual selection, and selection driving female-beneficial  
635 alleles to high frequency could result in sweeps and/or reduced balancing selection. However,  
636 perhaps analyses over the course of the experimental evolution study would be required to  
637 convincingly demonstrate associations between changes in sex-bias and potential measures of  
638 balancing selection.

639 In conclusion, we have examined genomic divergence following >160 generations of  
640 experimental evolution under altered mating systems. We find that genomic divergence  
641 between the experimental lines is highly clustered in the genome, much greater on the X and

642 is associated with changes in gene expression between the experimental lines. Associations  
643 with LD and population genetic parameters indicative of selective sweeps or balancing  
644 selection are also observed, but are very variable. This raises the possibility that selection has  
645 been strong in both M and E lines, but differs in nature (relaxed in M, directional in E),  
646 complicating predictions of responses. Overall, our main results support those seen in natural  
647 populations, providing an elegant demonstration of the power of experimental evolution to  
648 aid the interpretation of complex patterns of natural variation.

649

### 650 **Acknowledgments**

651 This work was part-funded by NERC (grant NE/I014632/1) to MGR & RRS and a combined  
652 Natural Environment Research Council and St Andrews 600th Anniversary PhD Studentship  
653 grant (NE/L501852/1) to RAWW. Sequencing was supported by the NERC Biomolecular  
654 Analysis Facility at the University of Liverpool (NBAF654). Computational analyses were  
655 supported by the University of St Andrews Bioinformatics Unit which is funded by a  
656 Wellcome Trust ISSF award (grant 105621/Z/14/Z). In addition the authors would like to  
657 thank Louise Reynolds, Paulina Giraldo-Perez, and Rudi Verspoor for help with DNA  
658 extraction protocols, and Mohamed Noor for helpful advice.

659

### 660 **Author contributions**

661 RAWW performed the data analysis. PV contributed data. The experiment was designed by  
662 MGR and RRS. All authors contributed to writing the MS.

663

### 664 **Data Accessibility**

665 Raw reads have been deposited in the short read archive (SRA) of NCBI under the BioProject  
666 PRJNA661678

667

668

## 669 **Figures and Figure Legends**

670

671 **Figure 1. A)** Manhattan plot of  $\log_{10}(\text{q-values})$  for each SNP from a quasibinomial GLM  
672 with treatment as a predictor. Red points denote SNPs with a q-value  $< 0.05$  and the  
673 horizontal red dashed line indicates the  $q < 0.05$  cutoff. Grey bars give the locations and span  
674 of the 70 divergent regions (see text). **B)** Mean ( $\pm$  SE) Tajima's D across replicates for the  
675 three most divergent regions (see text), red points denote SNPs with a q-value  $< 0.05$ , all  
676 have been plotted at the same value on the y-axis for convenience.

677

678 **Figure 2. A)** Levels of genetic diversity ( $\pi$ ) on each chromosome in E and M lines.  $\pi$  is  
679 estimated in overlapping windows of 50kb, then averaged across the chromosomes. Boxplots  
680 show the distribution of  $\pi$  on each chromosome across replicate experimental evolution lines.  
681 **B)** The X chromosome to autosome ratio of  $\pi$  in the replicates of E and M lines and overall.

682

683 **Figure 3. A)**  $F_{ST}$  between E and M treatment lines on the main chromosome arms for each  
684 replicate.  $F_{ST}$  is calculated for each SNP then averaged within overlapping 50kb windows on  
685 each chromosomal segment. **B)** The X:autosome ratio of  $F_{ST}$  within each replicate line. The  
686 error bars are bootstrap 95% confidence intervals. **C)** Observed  $F_{ST}$  on the autosomes (black)  
687 and on the X chromosome (dark grey) as well as the expected  $F_{ST}$  on the X chromosomes  
688 assuming a value of  $z = 6$  (light grey) (see Methods), error bars represent bootstrap 95%  
689 confidence intervals. **D)** The difference in  $F_{ST}$  between windows within "peaks" of top SNPs  
690 and windows outside of these peaks.

691

692 **Figure 4. A)** Slope coefficients from the model  $r^2 \sim a + \log(bp)$  where  $bp$  is the distance  
693 between pairs of SNPs and  $r^2$  is the average measure of LD between SNPs. Distributions are  
694 shown for average values of each of the main chromosomes as well as X chromosomes  
695 across replicates in E and M lines. **B)** Decay in LD as a function of distance between SNPs  
696 with the chromosome 3 peak region (see figure 3) and outside the peak region for E and M  
697 lines. **C)** The distribution of slope parameters for SNPs within the chromosome 3 peak and  
698 outside the peak region.

699

700 **Figure 5. A)**  $F_{ST}$  at DE vs. non-DE genes for different chromosome types. Asterisks indicate  
701 significant differences **B)** Tajima's D at DE vs. non-DE genes for different chromosome

702 types. C) relationship between change in sex-bias between E and M lines and Tajima's D in

703 M lines.

704

705 Figures S1 – S7 and Tables S1 – S3 can be found in the Supplementary Material

706

## 707 **References**

- 708 Allen, S.L., Bonduriansky, R. & Chenoweth, S.F. 2018. Genetic constraints on  
709 microevolutionary divergence of sex-biased gene expression. *Phil. Trans. Roy. Soc.*  
710 *B-Biol. Sci.* 373: 12.
- 711 Andres, J.A., Maroja, L.S. & Harrison, R.G. 2008. Searching for candidate speciation genes  
712 using a proteomic approach: seminal proteins in field crickets. *Proc. Roy. Soc. B-Biol.*  
713 *Sci.* 275: 1975-1983.
- 714 Arnosti, D.N. 2003. Analysis and function of transcriptional regulatory elements: Insights  
715 from *Drosophila*. *Ann. Rev. Entomol.* 48: 579-602.
- 716 Arnqvist, G., Edvardsson, M., Friberg, U. & Nilsson, T. 2000. Sexual conflict promotes  
717 speciation in insects. *Proc. Natl. Acad. Sci. USA* 97: 10460-10464.
- 718 Bacigalupe, L.D., Crudgington, H.S., Hunter, F., Moore, A.J. & Snook, R.R. 2007. Sexual  
719 conflict does not drive reproductive isolation in experimental populations of  
720 *Drosophila pseudoobscura*. *J. Evol. Biol.* 20: 1763-1771.
- 721 Barghi, N. & Schlotterer, C. 2019. Shifting the paradigm in Evolve and Resequencing studies:  
722 From analysis of single nucleotide polymorphisms to selected haplotype blocks. *Mol.*  
723 *Ecol.* 28: 521-524.
- 724 Barnett, D.W., Garrison, E.K., Quinlan, A.R., Stromberg, M.P. & Marth, G.T. 2011.  
725 BamTools: a C++ API and toolkit for analyzing and managing BAM files.  
726 *Bioinformatics* 27: 1691-1692.
- 727 Begun, D.J. & Lindfors, H.A. 2005. Rapid evolution of genomic Acp complement in the  
728 melanogaster subgroup of *Drosophila*. *Mol. Biol. Evol.* 22: 2010-2021.
- 729 Benjamini, Y. & Hochberg, Y. 1995. Controlling the false discovery rate - a practical and  
730 powerful approach to multiple testing. *J. Roy. Stat. Soc. Series B* 57: 289-300.
- 731 Blankers, T., Vilaça, S.T., Waurick, I., Gray, D.A., Hennig, R.M., Mazzoni, C.J., Mayer, F. &  
732 Berdan, E.L. 2018. Demography and selection shape transcriptomic divergence in  
733 field crickets. *Evolution* 72: 553-567.
- 734 Butlin, R., Debelle, A., Kerth, C., Snook, R.R., Beukeboom, L.W., Castillo Cajas, R.F., Diao,  
735 W., Maan, M.E., Paolucci, S., Weissing, F.J., van de Zande, L., Hoikkala, A.,  
736 Geuverink, E., Jennings, J., Kankare, M., Knott, K.E., Tyukmaeva, V.I., Zoumadakis,  
737 C., Ritchie, M.G., Barker, D., Immonen, E., Kirkpatrick, M., Noor, M., Macias  
738 Garcia, C., Schmitt, T., Schilthuizen, M. & Marie Curie, S.N. 2012. What do we need  
739 to know about speciation? *Trends Ecol. Evol.* 27: 27-39.
- 740 Butlin, R.K. & Smadja, C.M. 2018. Coupling, Reinforcement, and Speciation. *American*  
741 *Naturalist* 191: 155-172.
- 742 Chan, Y.F., Marks, M.E., Jones, F.C., Villarreal, G., Shapiro, M.D., Brady, S.D., Southwick,  
743 A.M., Absher, D.M., Grimwood, J., Schmutz, J., Myers, R.M., Petrov, D., Jonsson, B.,  
744 Schluter, D., Bell, M.A. & Kingsley, D.M. 2010. Adaptive evolution of pelvic  
745 reduction in sticklebacks by recurrent deletion of a *Pitx1* enhancer. *Science* 327: 302-  
746 305.
- 747 Chapman, T., Liddle, L.F., Kalb, J.M., Wolfner, M.F. & Partridge, L. 1995. Cost of mating in  
748 *Drosophila melanogaster* is mediated by male accessory gland products. *Nature* 373:  
749 241-244.
- 750 Cheng, C.D. & Kirkpatrick, M. 2016. Sex-specific selection and sex-biased gene expression  
751 in humans and flies. *Plos Genetics* 12: e1006170.
- 752 Cheng, C.D. & Kirkpatrick, M. 2020. The signal sex-specific selection in humans is not an  
753 artefact: Reply to Mank et al. *Mol. Ecol.* 29: 1406-1407.



- 754 Chenoweth, S.F., Appleton, N.C., Allen, S.L. & Rundle, H.D. 2015. Genomic evidence that  
755 sexual selection impedes adaptation to a novel environment. *Curr. Biol.* 25: 1860-  
756 1866.
- 757 Connallon, T. & Clark, A.G. 2012. A general population genetic framework for antagonistic  
758 selection that accounts for demography and recurrent mutation. *Genetics* 190: 1477-+.
- 759 Connallon, T. & Clark, A.G. 2013. Antagonistic versus nonantagonistic models of balancing  
760 selection: characterising the relative timescales and hitchhiking effects of partial  
761 selective sweeps.. *Evolution* 67: 908-917.
- 762 Corl, A. & Ellegren, H. 2012. The genomic signature of sexual selection in the genetic  
763 diversity of sex chromosomes and autosomes. *Evolution* 66: 2138-2149.
- 764 Counterman, B.A., Ortiz-Barrientos, D. & Noor, M.A.F. 2004. Using comparative genomic  
765 data to test for fast-x evolution. *Evolution* 58: 656-660.
- 766 Crudgington, H.S., Beckerman, A.P., Brustle, L., Green, K. & Snook, R.R. 2005.  
767 Experimental removal and elevation of sexual selection: Does sexual selection  
768 generate manipulative males and resistant females? *Amer. Natur.* 165: S72-S87.
- 769 Crudgington, H.S., Fellows, S., Badcock, N.S. & Snook, R.R. 2009. Experimental  
770 manipulation of sexual selection promotes greater male mating capacity but does not  
771 alter sperm investment. *Evolution* 63: 926-938.
- 772 Crudgington, H.S., Fellows, S. & Snook, R.R. 2010. Increased opportunity for sexual conflict  
773 promotes harmful males with elevated courtship frequencies. *J. Evol. Biol.* 23: 440-  
774 446.
- 775 Cruickshank, T.E. & Hahn, M.W. 2014. Reanalysis suggests that genomic islands of  
776 speciation are due to reduced diversity, not reduced gene flow. *Mol. Ecol.* 23: 3133-  
777 3157.
- 778 Dapper, A.L. & Wade, M.J. 2020. Relaxed selection and the rapid evolution of reproductive  
779 genes. *Trends in Genetics* 36: 640-649.
- 780 Debelle, A., Ritchie, M.G. & Snook, R.R. 2014. Evolution of divergent female mating  
781 preference in response to experimental sexual selection. *Evolution* 68: 2524-2533.
- 782 Debelle, A., Ritchie, M.G. & Snook, R.R. 2016. Sexual selection and assortative mating: an  
783 experimental test. *J. Evol. Biol.* 29: 1307-1316.
- 784 Debelle, A., Courtiol, A., Ritchie, M.G. & Snook, R.R. 2017. Mate choice intensifies motor  
785 signalling in *Drosophila*. *Anim. Behav.* 133: 169-187.
- 786 DePristo, M.A., Banks, E., Poplin, R., Garimella, K.V., Maguire, J.R., Hartl, C., Philippakis,  
787 A.A., del Angel, G., Rivas, M.A., Hanna, M., McKenna, A., Fennell, T.J., Kernysky,  
788 A.M., Sivachenko, A.Y., Cibulskis, K., Gabriel, S.B., Altshuler, D. & Daly, M.J. 2011.  
789 A framework for variation discovery and genotyping using next-generation DNA  
790 sequencing data. *Nat. Genet.* 43: 491-+.
- 791 Dobzhansky, T. & Sturtevant, A.H. 1938. Inversions in the chromosomes of *Drosophila*  
792 *pseudoobscura*. *Genetics* 23: 28-64.
- 793 Dutoit, L., Mugal, C.F., Bolivar, P., Wang, M., Nadachowska-Brzyska, K., Smeds, L., Yazdi,  
794 H.P., Gustafsson, L. & Ellegren, H. 2018. Sex-biased gene expression, sexual  
795 antagonism and levels of genetic diversity in the collared flycatcher (*Ficedula*  
796 *albicollis*) genome. *Mol. Ecol.* 27: 3572-3581.
- 797 Ellegren, H. & Parsch, J. 2007. The evolution of sex-biased genes and sex-biased gene  
798 expression. *Nat. Rev. Genet.* 8: 689-698.
- 799 Ellegren, H. 2009. The different levels of genetic diversity in sex chromosomes and  
800 autosomes. *Trends Genet.* 25: 278-284.
- 801 Ellegren, H., Smeds, L., Burri, R., Olason, P.I., Backstrom, N., Kawakami, T., Kunstner, A.,  
802 Makinen, H., Nadachowska-Brzyska, K., Qvarnstrom, A., Uebbing, S. & Wolf, J.B.W.

- 803           2012. The genomic landscape of species divergence in *Ficedula* flycatchers. *Nature*  
804           491: 756-760.
- 805 Ellis, E.A. & Oakley, T.H. 2016. High rates of species accumulation in animals with  
806           bioluminescent courtship displays. *Curr. Biol.* 26: 1916-1921.
- 807 Feder, A.F., Petrov, D.A. & Bergland, A.O. 2012. LDx: Estimation of Linkage Disequilibrium  
808           from high-throughput pooled resequencing data. *Plos One* 7: e48588
- 809 Gage, M.J.G., Parker, G.A., Nylin, S. & Wiklund, C. 2002. Sexual selection and speciation in  
810           mammals, butterflies and spiders. *Proc. Roy. Soc. Lond. B* 269: 2309-2316.
- 811 Gerrard, D.T., Fricke, C., Edward, D.A., Edwards, D.R. & Chapman, T. 2013. Genome-wide  
812           responses of female fruit flies subjected to divergent mating regimes. *Plos One* 8: 15.
- 813 Gershoni, M. & Pietrokovski, S. 2014. Reduced selection and accumulation of deleterious  
814           mutations in genes exclusively expressed in men. *Nat. Comms* 5: 10.
- 815 Grieshop, K. & Arnqvist, G. 2018. Sex-specific dominance reversal genetic variation for  
816           fitness. *PLOS Biol.* 16: e2006810.
- 817 Harrison, P.W., Wright, A.E., Zimmer, F., Dean, R., Montgomery, S.H., Pointer, M.A. &  
818           Mank, J.E. 2015. Sexual selection drives evolution and rapid turnover of male gene  
819           expression. *Proc. Natl. Acad. Sci. USA* 112: 4393-4398.
- 820 Hivert, V., Leblois, R., Petit, E.J., Gautier, M. & Vitalis, R. 2018. Measuring genetic  
821           differentiation from Pool-seq data. *Genetics* 210: 315-330.
- 822 Holland, B. & Rice, W.R. 1999. Experimental removal of sexual selection reverses  
823           intersexual antagonistic coevolution and removes a reproductive load. *Proc. Natl.*  
824           *Acad. Sci. USA* 96: 5083-5088.
- 825 Hollis, B., Houle, D., Yan, Z., Kawecki, T.J. & Keller, L. 2014. Evolution under monogamy  
826           feminizes gene expression in *Drosophila melanogaster*. *Nat. Comms.* 5: 3482.
- 827 Hosken, D.J., Garner, T.W.J. & Ward, P.I. 2001. Sexual conflict selects for male and female  
828           reproductive characters. *Curr. Biol.* 11: 489-493.
- 829 Hosken, D.J. & Ward, P.I. 2001. Experimental evidence for testis size evolution via sperm  
830           competition. *Ecol. Lett.* 4: 10-13.
- 831 Hunt, J., Snook, R.R., Mitchell, C., Crudgington, H.S. & Moore, A.J. 2012. Sexual selection  
832           and experimental evolution of chemical signals in *Drosophila pseudoobscura*. *J. Evol.*  
833           *Biol.* 25: 2232-2241.
- 834 Immonen, E., Snook, R.R. & Ritchie, M.G. 2014. Mating system variation drives rapid  
835           evolution of the female transcriptome in *Drosophila pseudoobscura*. *Ecol. Evol.* 4:  
836           2186-2201.
- 837 Innocenti, P., Flis, I. & Morrow, E.H. 2014. Female responses to experimental removal of  
838           sexual selection components in *Drosophila melanogaster*. *Bmc Evol. Biol.* 14: 239.
- 839 Janicke, T., Sandner, P., Ramm, S.A., Vizoso, D.B. & Scharer, L. 2016. Experimentally  
840           evolved and phenotypically plastic responses to enforced monogamy in a  
841           hermaphroditic flatworm. *J. Evol. Biol.* 29: 1713-1727.
- 842 Janicke, T., Ritchie, M.G., Morrow, E.H. & Marie-Orleach, L. 2018. Sexual selection predicts  
843           species richness across the animal kingdom. *Proc. Roy. Soc. B: Biol. Sci.* 285:  
844           20180173
- 845 Kang, L., Settlage, R., McMahon, W., Michalak, K., Tae, H., Garner, H.R., Stacy, E.A., Price,  
846           D.K. & Michalak, P. 2016. Genomic signatures of speciation in sympatric and  
847           allopatric Hawaiian picture-winged *Drosophila*. *Genome Biol. Evol.* 8: 1482-1488.
- 848 Kapun, M., Barrón, M.G., Staubach, F., Obbard, D.J., Wiberg, R.A.W., Vieira, J., Goubert,  
849           C., Rota-Stabelli, O., Kankare, M., Bogaerts-Márquez, M., Haudry, A., Waidele, L.,  
850           Kozeretska, I., Pasyukova, E.G., Loeschcke, V., Pascual, M., Vieira, C.P., Serga, S.,  
851           Montchamp-Moreau, C., Abbott, J., Gibert, P., Porcelli, D., Posnien, N., Sánchez-  
852           Gracia, A., Grath, S., Sucena, É., Bergland, A.O., Guerreiro, M.P.G., Onder, B.S.,

- 853 Argyridou, E., Guio, L., Schou, M.F., Deplancke, B., Vieira, C., Ritchie, M.G.,  
854 Zwaan, B.J., Tauber, E., Orenge, D.J., Puerma, E., Aguadé, M., Schmidt, P.S., Parsch,  
855 J., Betancourt, A.J., Flatt, T. & González, J. 2020. Genomic analysis of European  
856 *Drosophila melanogaster* populations reveals longitudinal structure, continent-wide  
857 selection, and previously unknown DNA viruses. *Mol. Biol. Evol.* 37: 2661–2678.
- 858 Kauranen, H., Kinnunen, J., Hiillos, A.-L., Lankinen, P., Hopkins, D., Wiberg, R.A.W.,  
859 Ritchie, M.G. & Hoikkala, A. 2019. Selection for reproduction under short  
860 photoperiods changes diapause-associated traits and induces widespread genomic  
861 divergence. *J. Exptl. Biol.* 222: jeb205831.
- 862 Kasimatis, K.R., Ralph, P.L. & Phillips, P.C. 2019. Limits to genomic divergence under  
863 sexually antagonistic selection. *G3-Genes Genomes Genetics* 9: 3813-3824.
- 864 Kawecki, T.J., Lenski, R.E., Ebert, D., Hollis, B., Olivieri, I. & Whitlock, M.C. 2012.  
865 Experimental evolution. *Trends Ecol. Evol.* 27: 547-560.
- 866 Kirkpatrick, M. & Hall, D.W. 2004. Sexual selection and sex linkage. *Evolution* 58: 683-691.
- 867 Kofler, R. & Schlotterer, C. 2012. Gowinda: unbiased analysis gene set enrichment for  
868 genome-wide association studies. *Bioinformatics* 28: 2084-2085.
- 869 Kraaijeveld, K., Kraaijeveld-Smit, F.J.L. & Maan, M.E. 2011. Sexual selection and  
870 speciation: the comparative evidence revisited. *Biol. Revs.* 86: 367-377.
- 871 Li, H., Handsaker, B., Wysoker, A., Fennell, T., Ruan, J., Homer, N., Marth, G., Abecasis, G.  
872 & Durbin, R. 2009. The Sequence Alignment/Map format and SAMtools.  
873 *Bioinformatics* 25.
- 874 Li, H. 2013. Aligning sequence reads, clone sequences and assembly contigs with BWA-  
875 MEM. arXiv: 1303.3997.
- 876 Maan, M.E. & Seehausen, O. 2011. Ecology, sexual selection and speciation. *Ecol. Lett.* 14:  
877 591-602.
- 878 Machado, H.E., Bergland, A.O., O'Brien, K.R., Behrman, E.L., Schmidt, P.S. & Petrov, D.A.  
879 2016. Comparative population genomics of latitudinal variation in *Drosophila*  
880 *simulans* and *Drosophila melanogaster*. *Mol. Ecol.* 25: 723-740.
- 881 Mank, J.E., Nam, K. & Ellegren, H. 2010a. Faster-Z evolution is predominantly due to  
882 genetic drift. *Mol. Biol. Evol.* 27: 661-670.
- 883 Mank, J.E., Vicoso, B., Berlin, S. & Charlesworth, B. 2010b. Effective population size and  
884 the faster-X effect: Empirical results and their interpretation. *Evolution* 64: 663-674.
- 885 Mank, J.E. 2017. Population genetics of sexual conflict in the genomic era. *Nat. Rev. Genet.*  
886 18: 721-730.
- 887 Mank, J.E., Shu, J.J. & Wright, A.E. 2020. Signature of sexual conflict is actually conflict  
888 resolved. *Mol. Ecol.* 29: 215-217.
- 889 Martin, O.Y. & Hosken, D.J. 2003. Costs and benefits evolving under experimentally  
890 enforced polyandry or monogamy. *Evolution* 57: 2765-2772.
- 891 Maston, G.A., Evans, S.K. & Green, M.R. 2006. Transcriptional regulatory elements in the  
892 human genome. *Ann. Rev. Genom. Human Genet.* 7: 29-59.
- 893 Mattersdorfer, K., Koblmüller, S. & Sefc, K.M. 2012. AFLP genome scans suggest divergent  
894 selection on colour patterning in allopatric colour morphs of a cichlid fish. *Mol. Ecol.*  
895 21: 3531-3544.
- 896 McKenna, A., Hanna, M., Banks, E., Sivachenko, A., Cibulskis, K., Kernytsky, A., Garimella,  
897 K., Altshuler, D., Gabriel, S., Daly, M. & DePristo, M.A. 2010. The Genome Analysis  
898 Toolkit: A MapReduce framework for analyzing next-generation DNA sequencing  
899 data. *Genome Research* 20: 1297-1303.
- 900 McLeay, R.C. & Bailey, T.L. 2010. Motif Enrichment Analysis: a unified framework and an  
901 evaluation on CHIP data. *Bmc Bioinformatics* 11: 11.

- 902 McNamara, K.B., Sloan, N.S., Kershaw, S.E., Van Lieshout, E. & Simmons, L.W. 2020.  
903 Males evolve to be more harmful under increased sexual conflict intensity in a seed  
904 beetle. *Behav. Ecol.* 31: 591-597.
- 905 Meisel, R.P. & Connallon, T. 2013. The faster-X effect: integrating theory and data. *Trends*  
906 *Genet.* 29: 537-544.
- 907 Michalak, P., Kang, L., Schou, M.F., Garner, H.R. & Loeschcke, V. 2019. Genomic signatures  
908 of experimental adaptive radiation in *Drosophila*. *Mol. Ecol.* 28: 600-614.
- 909 Montgomery, S.H. & Mank, J.E. 2016. Inferring regulatory change from gene expression: the  
910 confounding effects of tissue scaling. *Mol. Ecol.* 25: 5114-5128.
- 911 Noor, M.A.F. & Bennett, S.M. 2009. Islands of speciation or mirages in the desert?  
912 Examining the role of restricted recombination in maintaining species. *Heredity* 103:  
913 439-444.
- 914 Nosil, P., Funk, D.J. & Ortiz-Barrientos, D. 2009. Divergent selection and heterogeneous  
915 genomic divergence. *Mol. Ecol.* 18: 375-402.
- 916 Nyberg, K.G. & Machado, C.A. 2016. Comparative expression dynamics of intergenic long  
917 noncoding RNAs in the genus *Drosophila*. *Genome Biol. Evol.* 8: 1839-1858.
- 918 Panhuis, T.M., Butlin, R., Zuk, M. & Tregenza, T. 2001. Sexual selection and speciation.  
919 *Trends Ecol. Evol.* 16: 364-371.
- 920 Pennacchio, L.A., Bickmore, W., Dean, A., Nobrega, M.A. & Bejerano, G. 2013. Enhancers:  
921 five essential questions. *Nature Rev Genet.* 14: 288-295.
- 922 Perry, J.C., Joag, R., Hosken, D.J., Wedell, N., Radwan, J. & Wigby, S. 2016. Experimental  
923 evolution under hyper-promiscuity in *Drosophila melanogaster*. *Bmc Evol. Biol.* 16:  
924 14.
- 925 Pizzari, T. & Wedell, N. 2013. The polyandry revolution. *Phil. Trans. Roy. Soc. London. B,*  
926 *Biol. Sci.* 368: 20120041.
- 927 Pröschel, M., Zhang, Z. & Parsch, J. 2006. Widespread adaptive evolution of drosophila  
928 genes with sex-biased expression. *Genetics* 174: 893-900.
- 929 Quinlan, A.R. & Hall, I.M. 2010. BEDTools: a flexible suite utilities for comparing genomic  
930 features. *Bioinformatics* 26: 841-842.
- 931 R Development Core Team. 2020. R: A language and environment for statistical computing.  
932 R Foundation for Statistical Computing. Vienna, Austria, <https://www.R-project.org/>
- 933 Ram, K.R. & Wolfner, M.F. 2007. Seminal influences: *Drosophila* Acps and the molecular  
934 interplay between males and females during reproduction. *Integ. Compar. Biol.* 47:  
935 427-445.
- 936 Ramachandran, S., Rosenberg, N.A., Zhivotovsky, L.A. & Feldman, M.W. 2004. Robustness  
937 inference of human population structure: A comparison of X-chromosomal and  
938 autosomal microsatellites. *Human Genomics* 1: 87-97.
- 939 Ravinet, M., Faria, R., Butlin, R.K., Galindo, J., Bierne, N., Rafajlovic, M., Noor, M.A.F.,  
940 Mehlig, B. & Westram, A.M. 2017. Interpreting the genomic landscape of speciation:  
941 a road map for finding barriers to gene flow. *J. Evol. Biol.* 30: 1450-1477.
- 942 Reinhold, K. 1998. Sex linkage among genes controlling sexually selected traits. *Behav. Ecol.*  
943 *Sociobiol.* 44: 1-7.
- 944 Ritchie, M.G. 2007. Sexual selection and speciation. *Ann. Rev. Ecol. Evol. Syst.* 38: 79-102.
- 945 Robinson, M.D., McCarthy, D.J. & Smyth, G.K. 2010. edgeR: a Bioconductor package for  
946 differential expression analysis digital gene expression data. *Bioinformatics* 26: 139-  
947 140.
- 948 Ruzicka, F., Hill, M.S., Pennell, T.M., Flis, I., Ingleby, F.C., Mott, R., Fowler, K., Morrow,  
949 E.H. & Reuter, M. 2019. Genome-wide sexually antagonistic variants reveal long-  
950 standing constraints on sexual dimorphism in fruit flies. *Plos Biol.* 17.

- 951 Sayadi, A., Martinez Barrio, A., Immonen, E., Dainat, J., Berger, D., Tellgren-Roth, C.,  
952 Nystedt, B. & Arnqvist, G. 2019. The genomic footprint of sexual conflict. *Nature*  
953 *Ecol. & Evol.* 3: 1725-1730.
- 954 Schlotterer, C., Tobler, R., Kofler, R. & Nolte, V. 2014. Sequencing pools of individuals-  
955 mining genome-wide polymorphism data without big funding. *Nature Rev. Genet.* 15:  
956 749-763.
- 957 Servedio, M.R. & Boughman, J.W. 2017. The role of sexual selection in local adaptation and  
958 speciation. *Ann. Rev. Ecol., Evol., System.* 48; 85-109.
- 959 Smadja, C. & Butlin, R.K. 2009. On the scent of speciation: the chemosensory system and its  
960 role in premating isolation. *Heredity* 102: 77-97.
- 961 Snook, R.R., Brustle, L. & Slate, J. 2009. A test and review of the role effective population  
962 size on experimental sexual selection patterns. *Evolution* 63: 1923-1933.
- 963 Snook, R.R. 2014. The evolution of polyandry. pp 159-180 in *Evolution of Insect Mating*  
964 *Systems* (Eds. Shuker D.M. & Simmons L.W). Oxford Univ Press, New York.
- 965 Storey, J.D. & Tibshirani, R. 2003. Statistical significance for genomewide studies. *Proc.*  
966 *Natl. Acad. Sci. USA* 100: 9440-9445.
- 967 Sturtevant, A.H. & Dobzhansky, T. 1936. Inversions in the third chromosome wild races  
968 *Drosophila pseudoobscura*, and their use in the study history species. *Proc. Natl.*  
969 *Acad. Sci. USA* 22: 448-450.
- 970 Swanson, W.J. & Vacquier, V.D. 2002. The rapid evolution reproductive proteins. *Nature Rev.*  
971 *Genet.* 3: 137-144.
- 972 Thistle, R., Cameron, P., Ghorayshi, A., Dennison, L. & Scott, K. 2012. Contact  
973 chemoreceptors mediate male-male repulsion and male-female attraction during  
974 *Drosophila* courtship. *Cell* 149: 1140-1151.
- 975 Tobler, R., Franssen, S.U., Kofler, R., Orozco-terWengel, P., Nolte, V., Hermisson, J. &  
976 Schlotterer, C. 2014. Massive habitat-specific genomic response in *D. melanogaster*  
977 populations during experimental evolution in hot and cold environments. *Mol. Biol.*  
978 *Evol.* 31: 364-375.
- 979 Toda, H., Zhao, X.L. & Dickson, B.J. 2012. The *Drosophila* female aphrodisiac pheromone  
980 activates ppk23 sensory neurons to elicit male courtship behavior. *Cell Reports* 1:  
981 599-607.
- 982 Trapnell, C., Williams, B.A., Pertea, G., Mortazavi, A., Kwan, G., van Baren, M.J., Salzberg,  
983 S.L., Wold, B.J. & Pachter, L. 2010. Transcript assembly and quantification by RNA-  
984 Seq reveals unannotated transcripts and isoform switching during cell differentiation.  
985 *Nature Biotech.* 28: 511-U174.
- 986 Turner, T.L., Hahn, M.W. & Nuzhdin, S.V. 2005. Genomic islands of speciation in *Anopheles*  
987 *gambiae*. *Plos Biol.* 3: 1572-1578.
- 988 Veltsos, P., Fang, Y., Cossins, A.R., Snook, R.R. & Ritchie, M.G. 2017. Mating system  
989 manipulation and the evolution of sex-biased gene expression in *Drosophila*. *Nat.*  
990 *Comms.* 8: 2072.
- 991 Vicoso, B. & Charlesworth, B. 2006. Evolution on the X chromosome: unusual patterns and  
992 processes. *Nat. Rev. Genet.* 7: 645-653.
- 993 Wallace, A.G., Detweiler, D. & Schaeffer, S.W. 2011. Evolutionary history of third  
994 chromosome gene arrangements of *Drosophila pseudoobscura* inferred from  
995 inversion breakpoints. *Mol. Biol. Evol.* 28: 2219-2229.
- 996 Weng, M.P. & Liao, B.Y. 2017. modPhEA: model organism Phenotype Enrichment Analysis  
997 of Eukaryotic gene sets. *Bioinformatics* 33: 3505-3507.
- 998 Werner, T., Koshikawa, S., Williams, T.M. & Carroll, S.B. 2010. Generation of a novel wing  
999 colour pattern by the Wingless morphogen. *Nature* 464: 1143-U1157.

- 1000 White, N.J., Snook, R.R. & Eyres, I. 2020. The past and future of experimental speciation.  
1001 Trends Ecol. & Evol. 35: 10-21.
- 1002 Wiberg, R.A.W., Gaggiotti, O.E., Morrissey, M.B. & Ritchie, M.G. 2017. Identifying  
1003 consistent allele frequency differences in studies of stratified populations. Meth.Ecol.  
1004 Evol. 8: 1899-1909.
- 1005 Wickham, H. 2009. ggplot2: Elegant Graphics for Data Analysis. Springer, New York.
- 1006 Wolf, J.B.W. & Ellegren, H. 2016. Making sense of genomic islands of differentiation in light  
1007 speciation. Nat. Rev. Genet. 18: 87-100.
- 1008 Wright, A.E., Harrison, P.W., Zimmer, F., Montgomery, S.H., Pointer, M.A. & Mank, J.E.  
1009 2015. Variation in promiscuity and sexual selection drives avian rate Faster-Z  
1010 evolution. Mol. Ecol. 24: 1218-1235.
- 1011 Wright, A.E., Rogers, T.F., Fumagalli, M., Cooney, C.R. & Mank, J.E. 2019. Phenotypic  
1012 sexual dimorphism is associated with genomic signatures of resolved sexual conflict.  
1013 Mol. Ecol. 28: 2860-2871.
- 1014 Zhang, Y., Sturgill, D., Parisi, M., Kumar, S. & Oliver, B. 2007. Constraint and turnover in  
1015 sex-biased gene expression in the genus *Drosophila*. Nature 450: 233-237.
- 1016
- 1017

**Figure 1****A**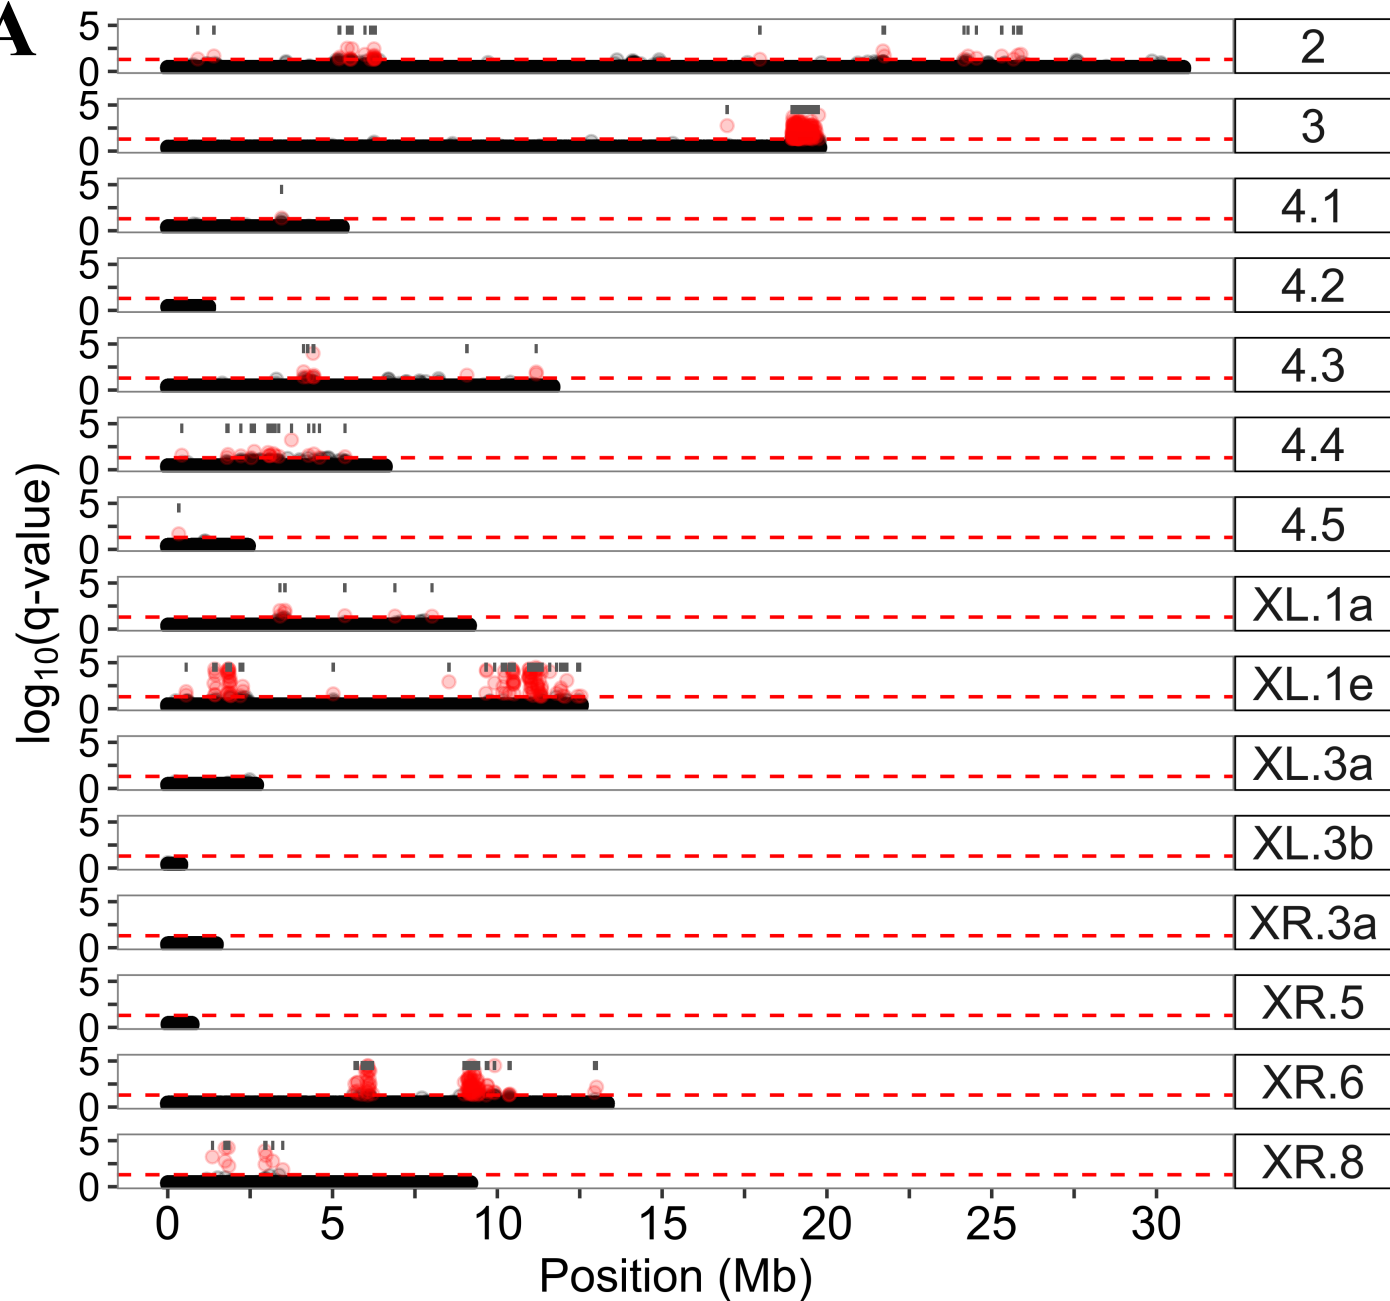**B**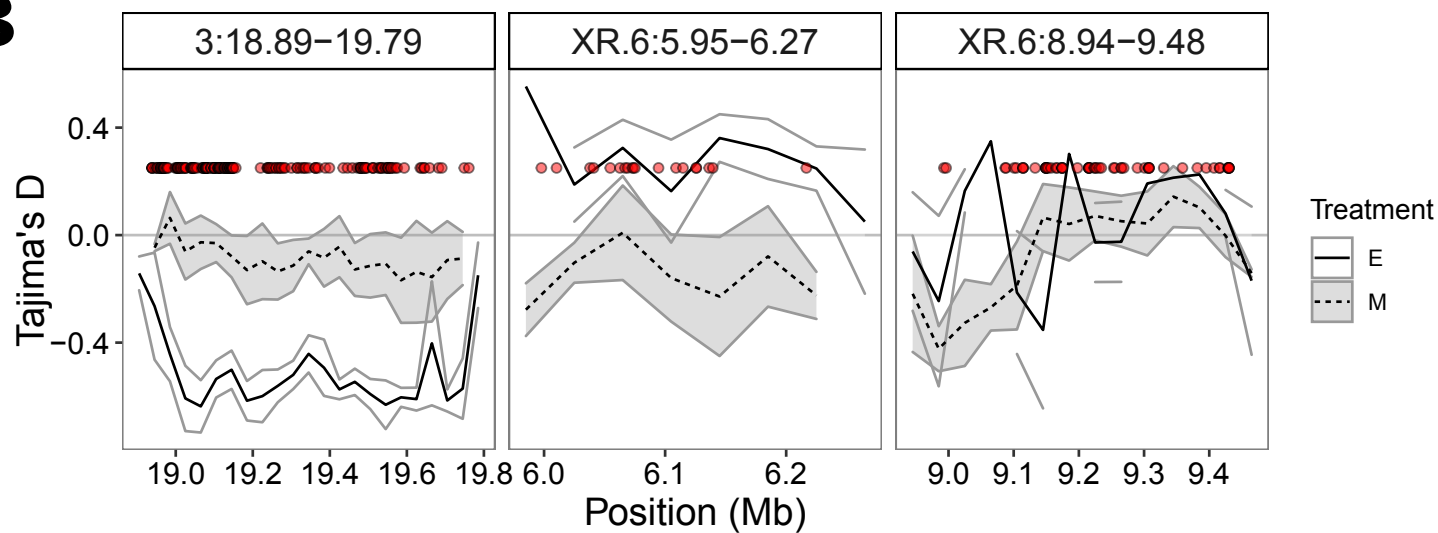

Figure 2

**A**

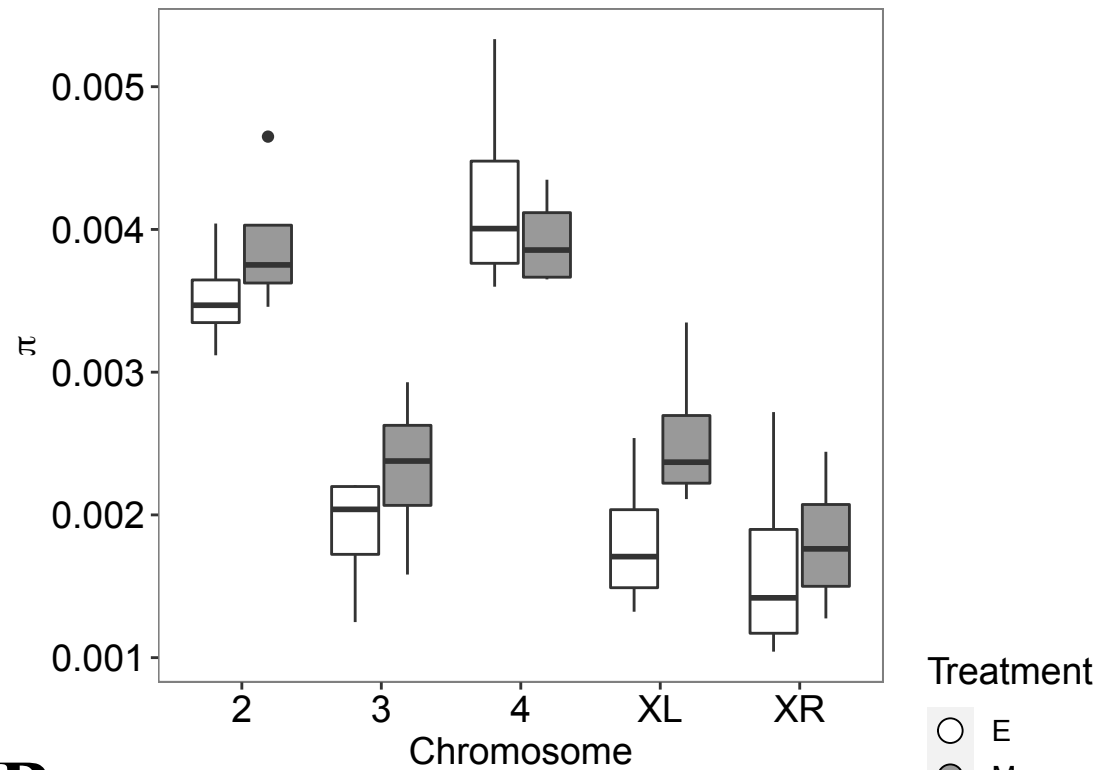

**B**

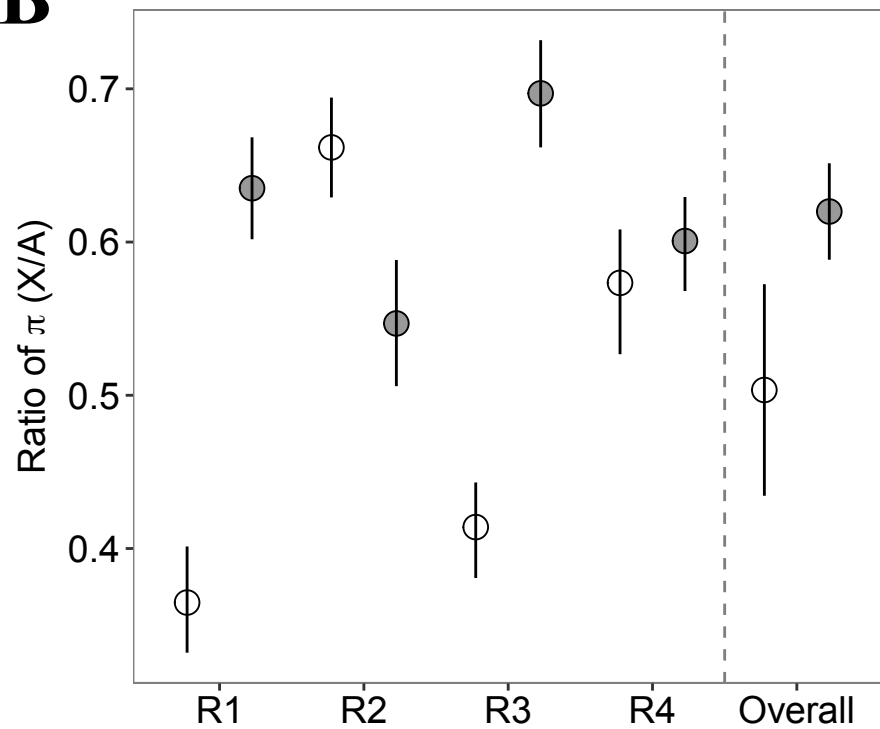



Figure 3

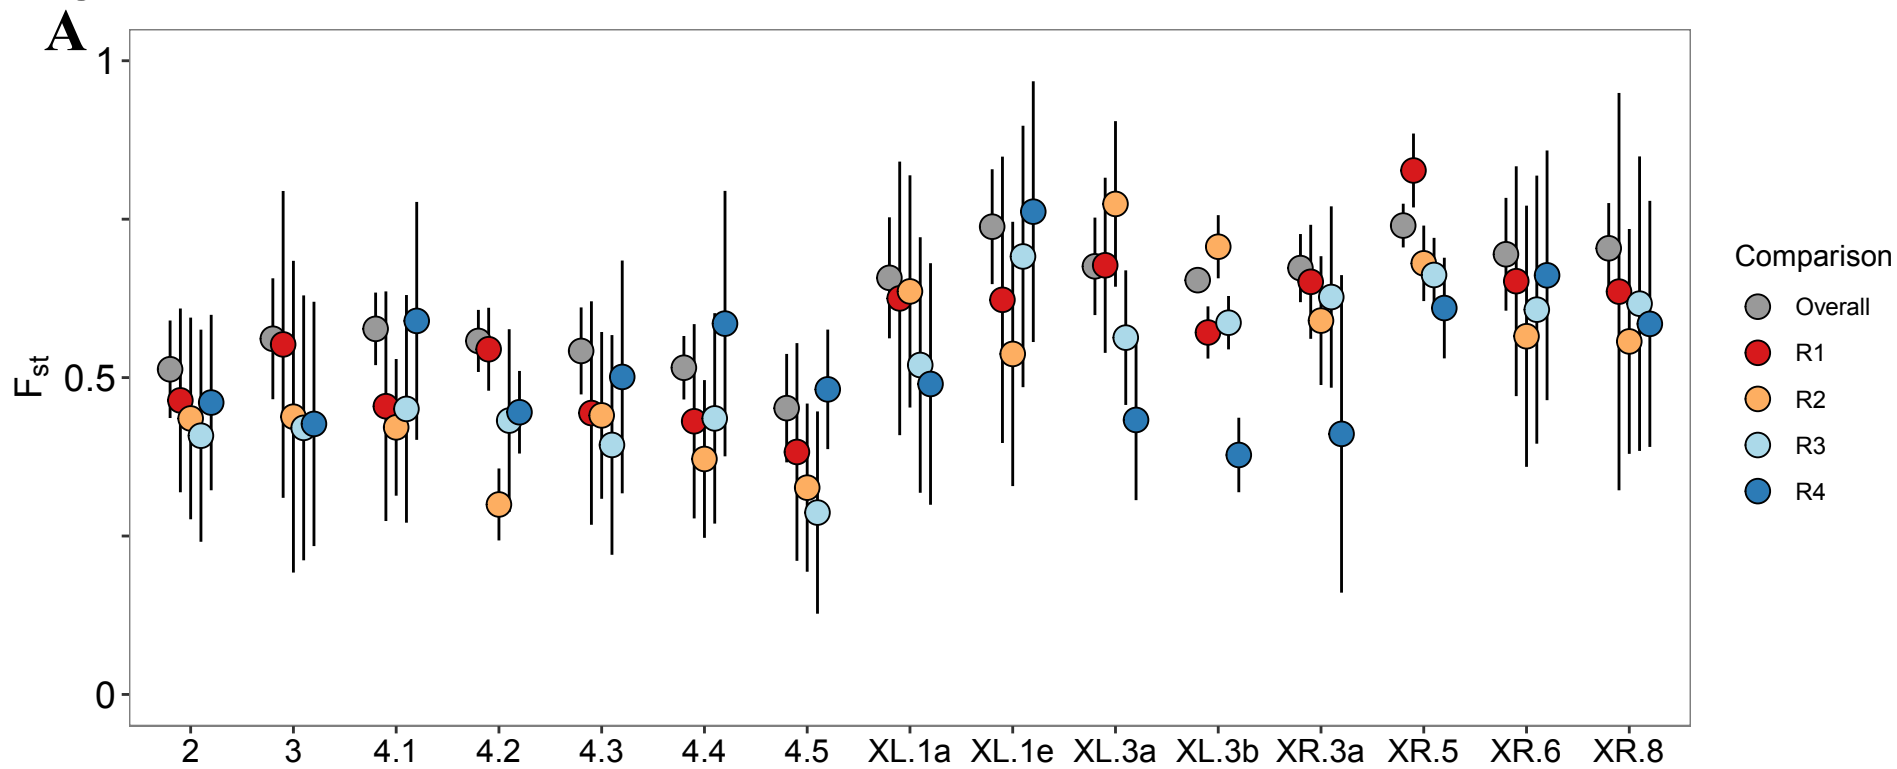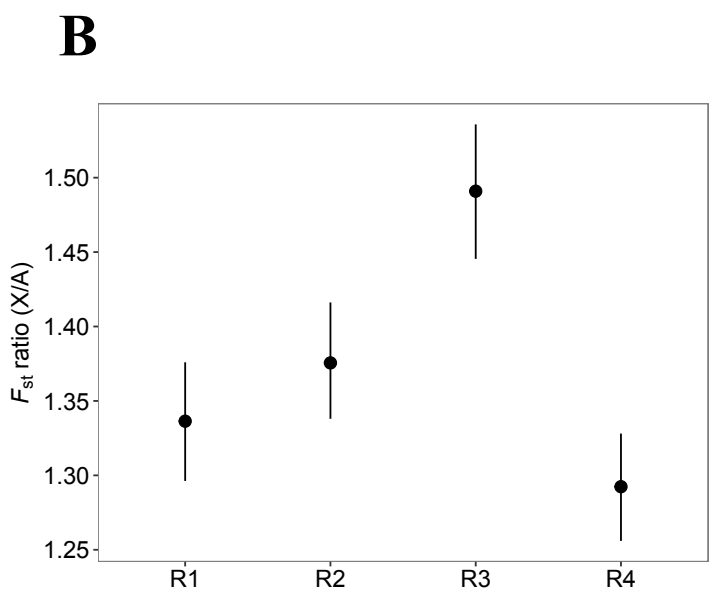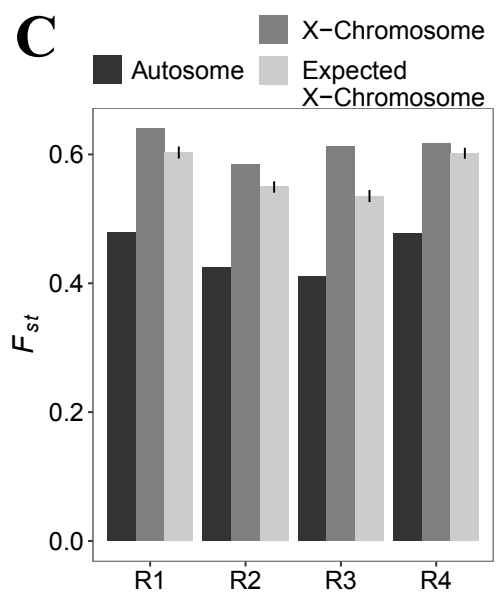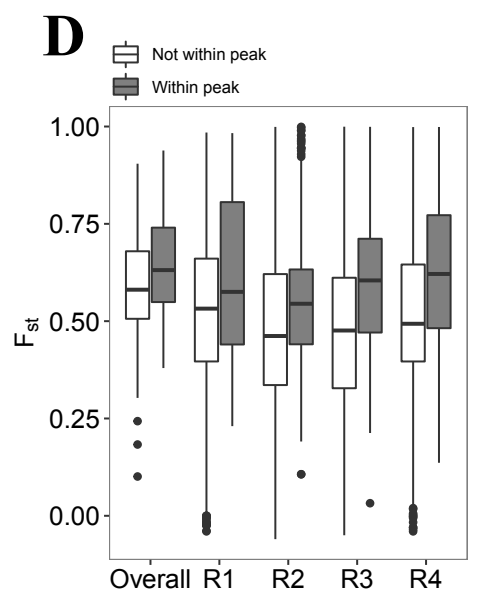

# Figure 4

**A**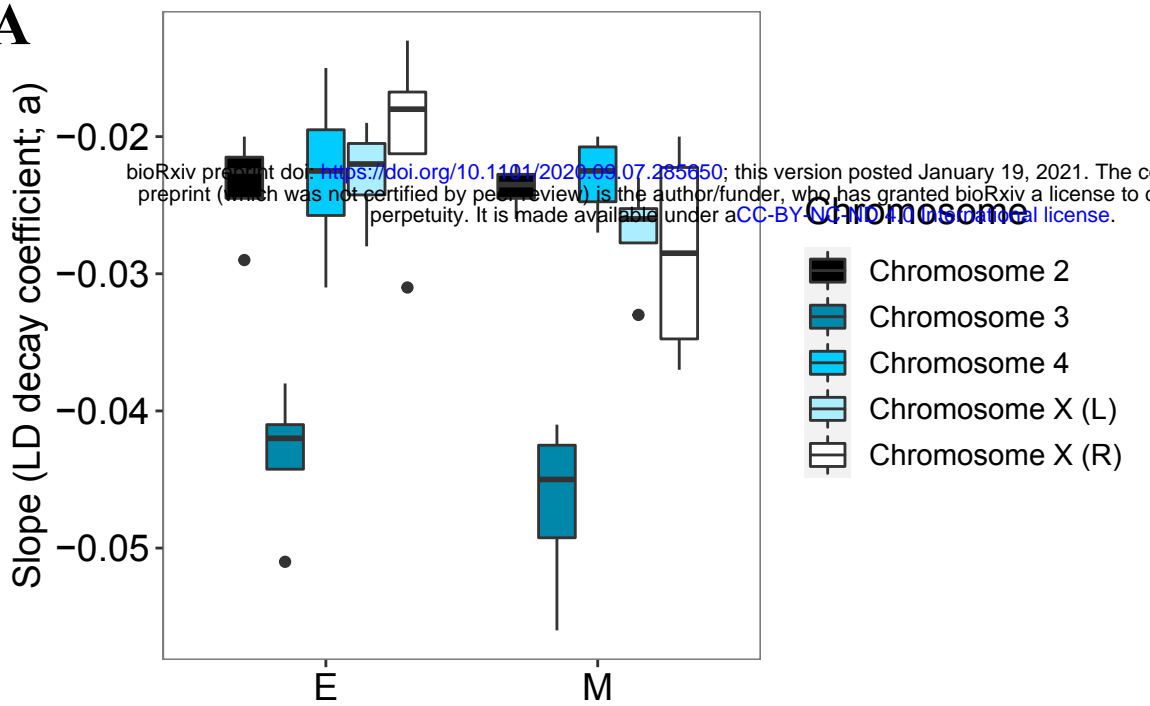**B**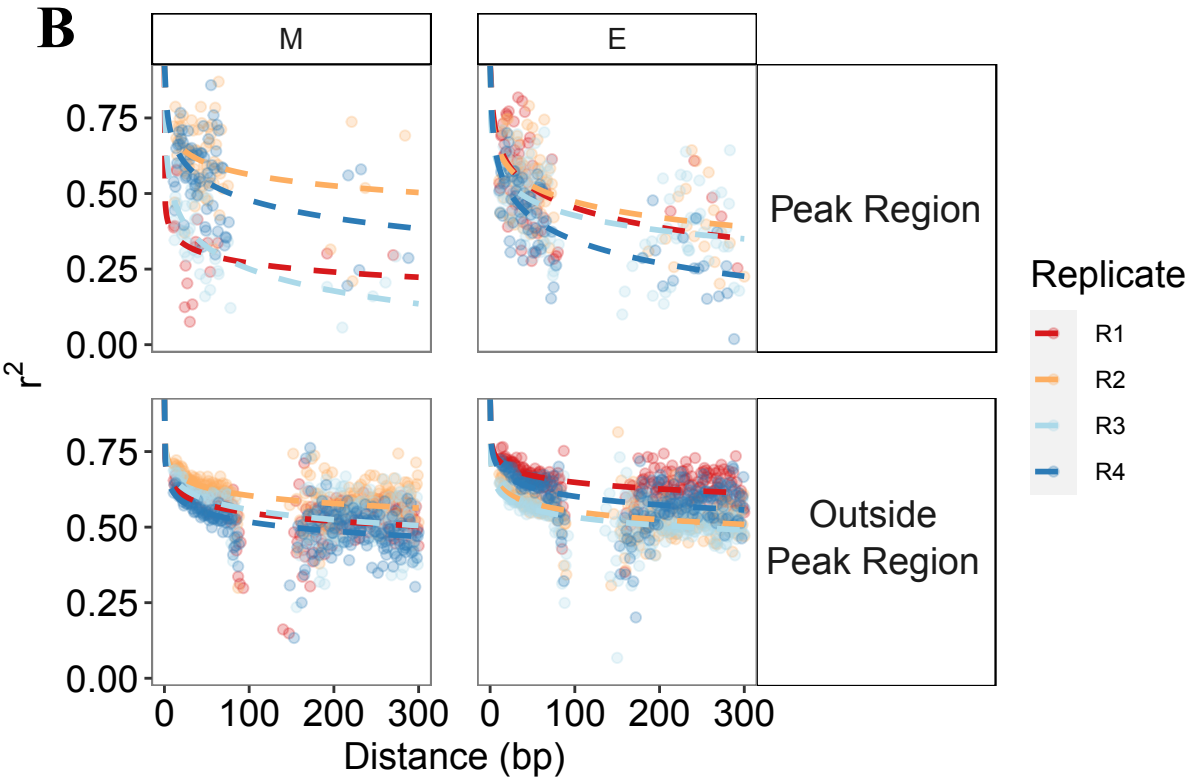**C**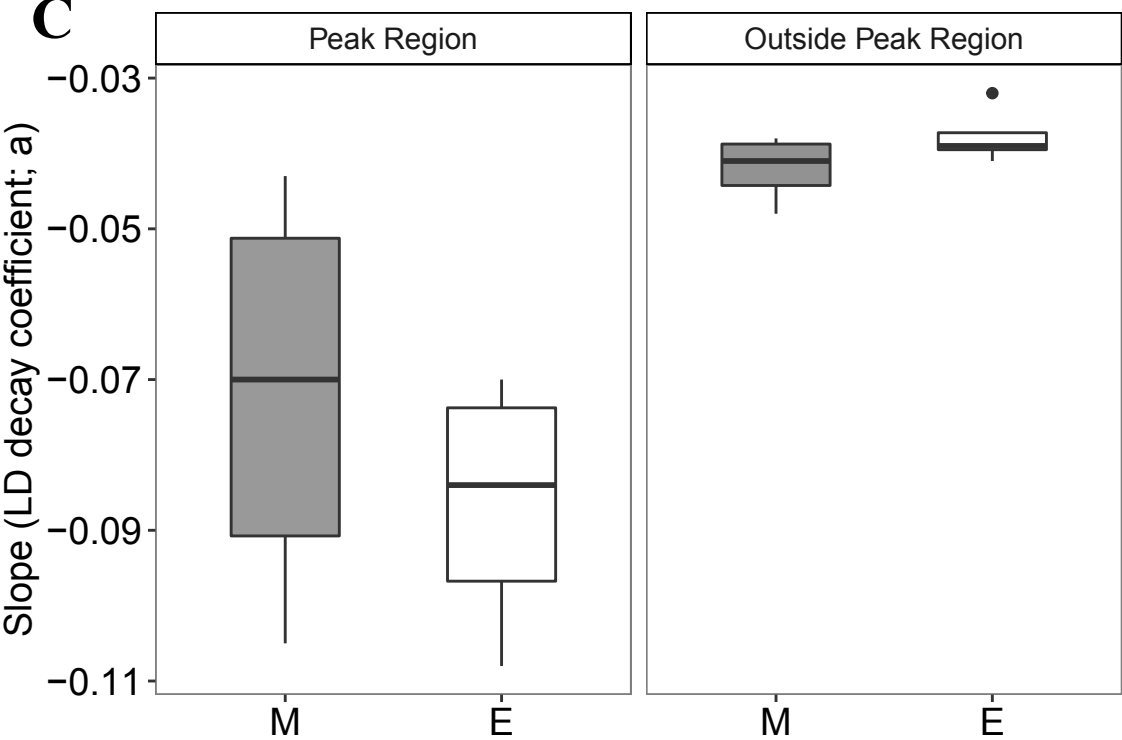

# Figure 5

**A**

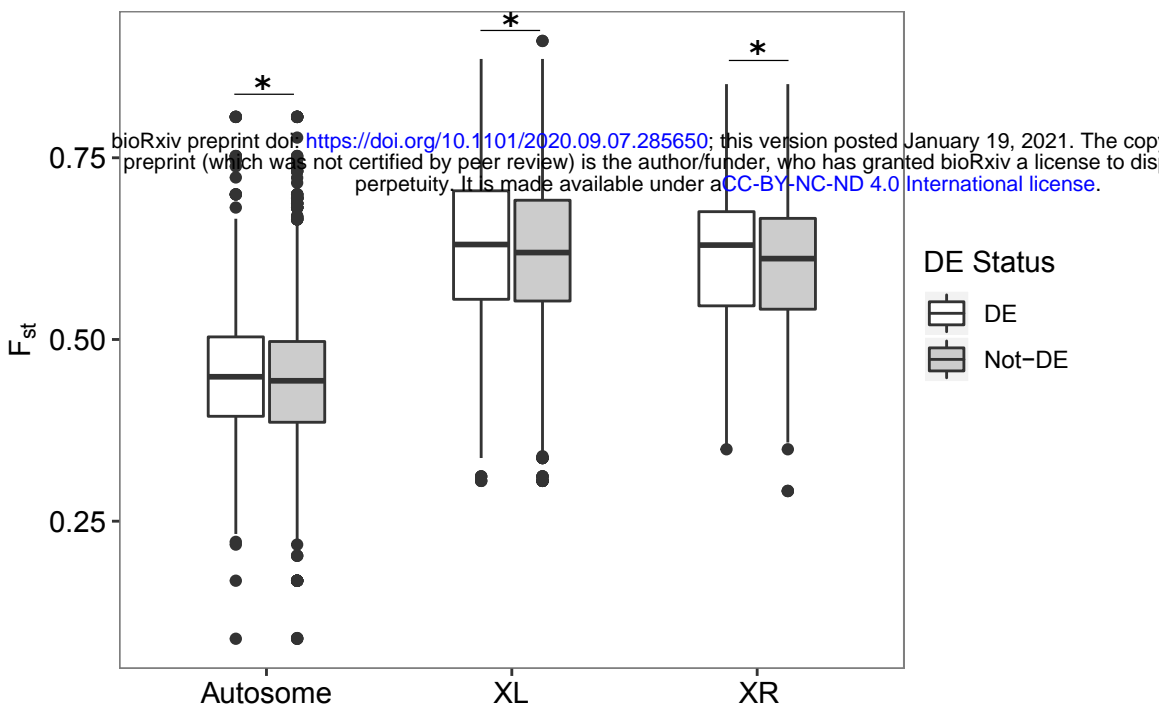

**B**

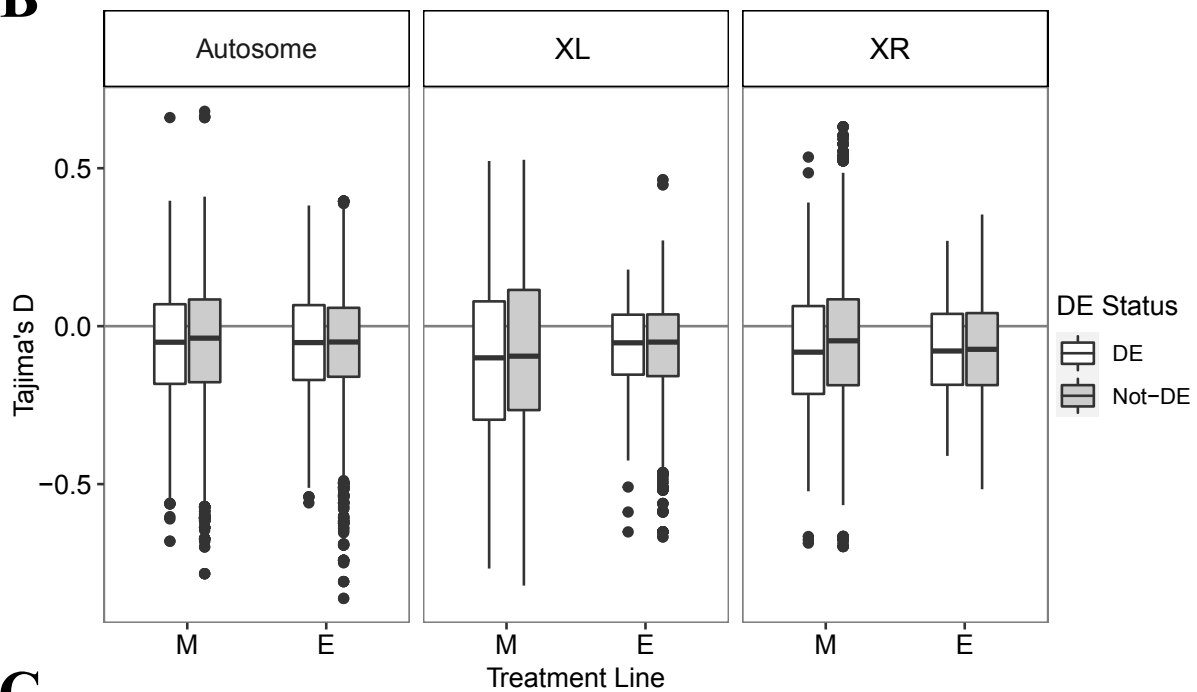

**C**

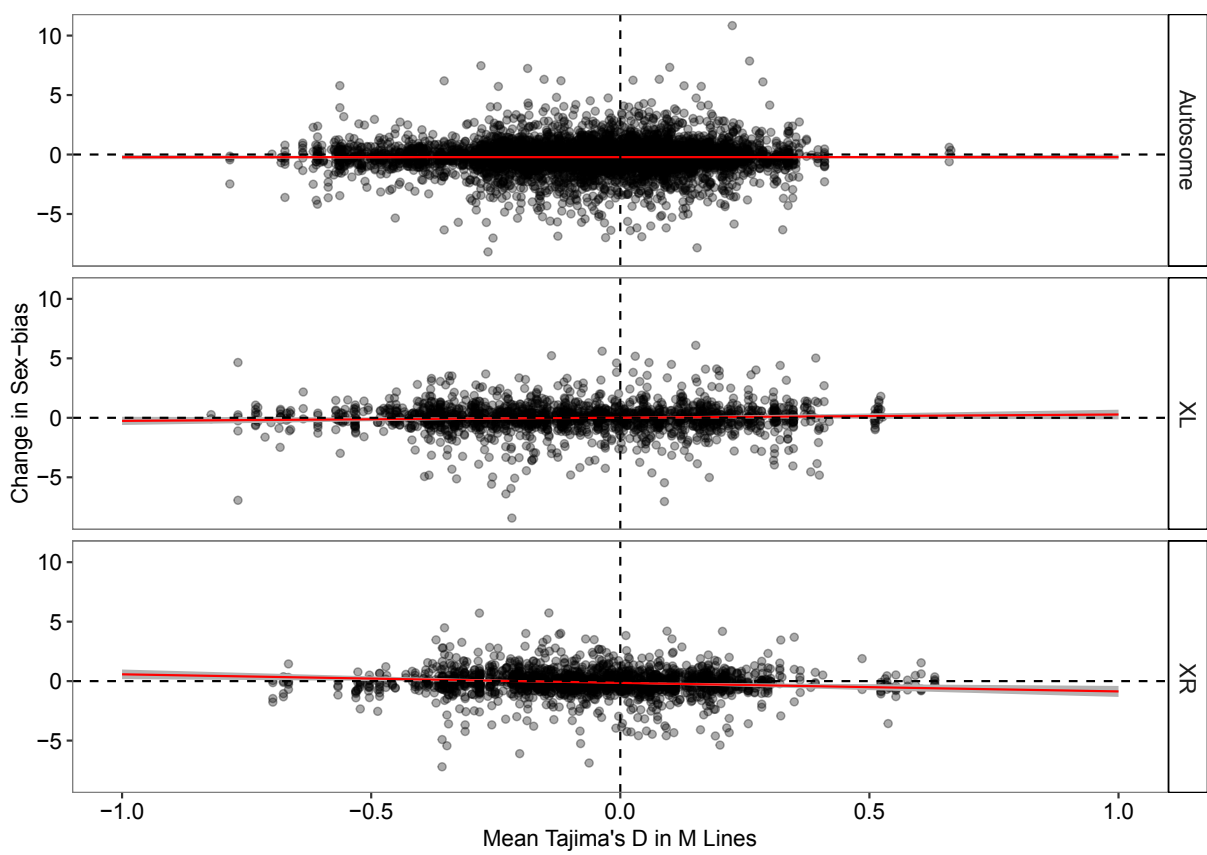

Source: https://www.biorxiv.org/content/10.1101/2020.09.07.285650v2.full.pdf
